# Supplementary material for: Thiourea and isothiocyanate – two useful chromophores for stereochemical studies. A comparison of experiment and computation
Source: Royal Society of Chemistry journal article supplement (doi:10.1039/b821335f), 2009-01-01

## Supplementary Data

### Thiourea and Isothiocyanate – Two Useful Chromophores for Stereochemical Studies. A Comparison of Experiment and Computation.

Jacek Gawronski,\* Marcin Kwit and Pawel Skowronek

Department of Chemistry, A. Mickiewicz University, Grunwaldzka 6, 60 780 Poznan, Poland. Fax: 00 48 61 829 1505; Tel: 00 61 829 1313; E-mail: gawronsk@amu.edu.pl

- S3. Figure A. Calculated at B3LYP/6-311++G(2D,2P) level structures of thermally accessible conformers of **1–3**, labeled according to their increasing energies.
- S4. Figure B. Calculated at B3LYP/6-311++G(2D,2P) level structures of thermally accessible conformers of **4**. Note that conformers are labeled according to their structural similarity and increasing energies
- S5. Figure C. Calculated at B3LYP/6-311++G(2D,2P) level structures of thermally accessible conformers of **5 – 10**.
- S6. Figure D. Calculated at B3LYP/6-311++G(D,P) level PES for the rotation around the C–N bonds in diequatorial (a) and diaxial (b) conformations of **4**.
- S7. Figure E. Calculated at TDDFT/B3LYP/6-311++G(2D,2P) level of theory (black lines) and TDDFT/B2LYP/6-311++G(2D,2P) level of theory (red lines) UV spectra for model compounds **1a**, **2a**, **3a** and **10'** (wavelength not corrected).
- S8. Figure F. Calculated at TDDFT/B3LYP/6-311++G(2D,2P) level of theory (black lines) and TDDFT/B2LYP/6-311++G(2D,2P) level of theory (red lines) UV spectra for individual conformers of **1b** (wavelength not corrected).
- S9. Figure G. Calculated at TDDFT/B3LYP/6-311++G(2D,2P) level of theory (blue lines) and TDDFT/B2LYP/6-311++G(2D,2P) level of theory (red lines) UV (upper panels) and CD (middle panels – velocity; lower panels – length method) spectra for individual conformers of **4**. All calculated spectra were wavelength corrected to match the experimental UV spectrum of **4**.
- S10. Figure G. continued
- S11. Figure H. Calculated at TDDFT/B3LYP/6-311++G(2D,2P) level of theory (solid lines) and TDDFT/B2LYP/6-311++G(2D,2P) level of theory (dashed lines) UV (upper panels) CD spectra for families of structurally similar conformers of compound **4**, normalized to their relative populations (wavelength not corrected).
- S12. Figure I. Calculated at TDDFT/B3LYP/6-311++G(2D,2P) level of theory (blue lines) and TDDFT/B2LYP/6-311++G(2D,2P) level of theory (red lines) UV (upper panels) and CD (middle panels – velocity; lower panels – length method) spectra for individual conformers of **5a** (wavelength not corrected).
- S13. Figure J. Calculated at TDDFT/B3LYP/6-311++G(2D,2P) level of theory (blue lines) and TDDFT/B2LYP/6-311++G(2D,2P) level of theory (red lines) UV (upper panels) and CD (middle panels – velocity; lower panels – length method) spectra for individual conformers of **5b**. All calculated spectra were wavelength corrected to match the experimental UV spectrum of **5b**.
- S14. Figure K. Calculated at TDDFT/B3LYP/6-311++G(2D,2P) level of theory (blue lines) and TDDFT/B2LYP/6-311++G(2D,2P) level of theory (red lines) UV (upper panels) and CD (middle panels – velocity; lower panels – length method) spectra for individual conformers of **8a** (wavelength not corrected).
- S15. Figure L. Calculated at TDDFT/B3LYP/6-311++G(2D,2P) level of theory (blue lines) and TDDFT/B2LYP/6-311++G(2D,2P) level of theory (red lines) UV (upper panels) and CD (middle panels – velocity; lower panels – length method) spectra for individual conformers of **8b**. All calculated spectra were wavelength corrected to match the experimental UV spectrum of **8b**.
- S16. Figure M. Calculated at TDDFT/B3LYP/6-311++G(2D,2P) level of theory (blue lines) and TDDFT/B2LYP/6-311++G(2D,2P) level of theory (red lines) UV (upper panels) and CD (middle panels –

velocity; lower panels – length method) spectra for individual conformers of **9**. All calculated spectra were wavelength corrected to match the experimental UV spectrum of **9**.

- S17. Figure N. Experimental (black lines, left panels) and calculated at TDDFT/B3LYP/6-311++G(2D,2P) level of theory (blue lines) and TDDFT/B2LYP/6-311++G(2D,2P) level of theory (red lines, right panels) CD spectra for of **5a** (upper panels) and **8a** (lower panels). All calculated spectra were wavelength corrected to match the experimental UV spectra of **5a** and **8a**.
- S18. <sup>1</sup>H NMR spectra of **5a**
- S19. <sup>13</sup>C NMR spectra of **5a**
- S20. MS spectra of **5a**
- S21. <sup>1</sup>H NMR spectra of **5b**
- S22. <sup>13</sup>C NMR spectra of **5b**
- S23. MS spectra of **5b**
- S24. <sup>1</sup>H NMR spectra of **7**
- S25. <sup>13</sup>C NMR spectra of **7**
- S26. MS spectra of **7**
- S27. <sup>1</sup>H NMR spectra of **8a**
- S28. <sup>13</sup>C NMR spectra of **8a**
- S29. MS spectra of **8a**
- S30. <sup>1</sup>H NMR spectra of **8b**
- S31. <sup>13</sup>C NMR spectra of **8b**
- S32. MS spectra of **8b**
- S33. <sup>1</sup>H NMR spectra of **9**
- S34. <sup>13</sup>C NMR spectra of **9**
- S35. MS spectra of **9**
- S36. <sup>1</sup>H NMR spectra of **10**
- S37. <sup>13</sup>C NMR spectra of **10**
- S38. MS spectra of **10**

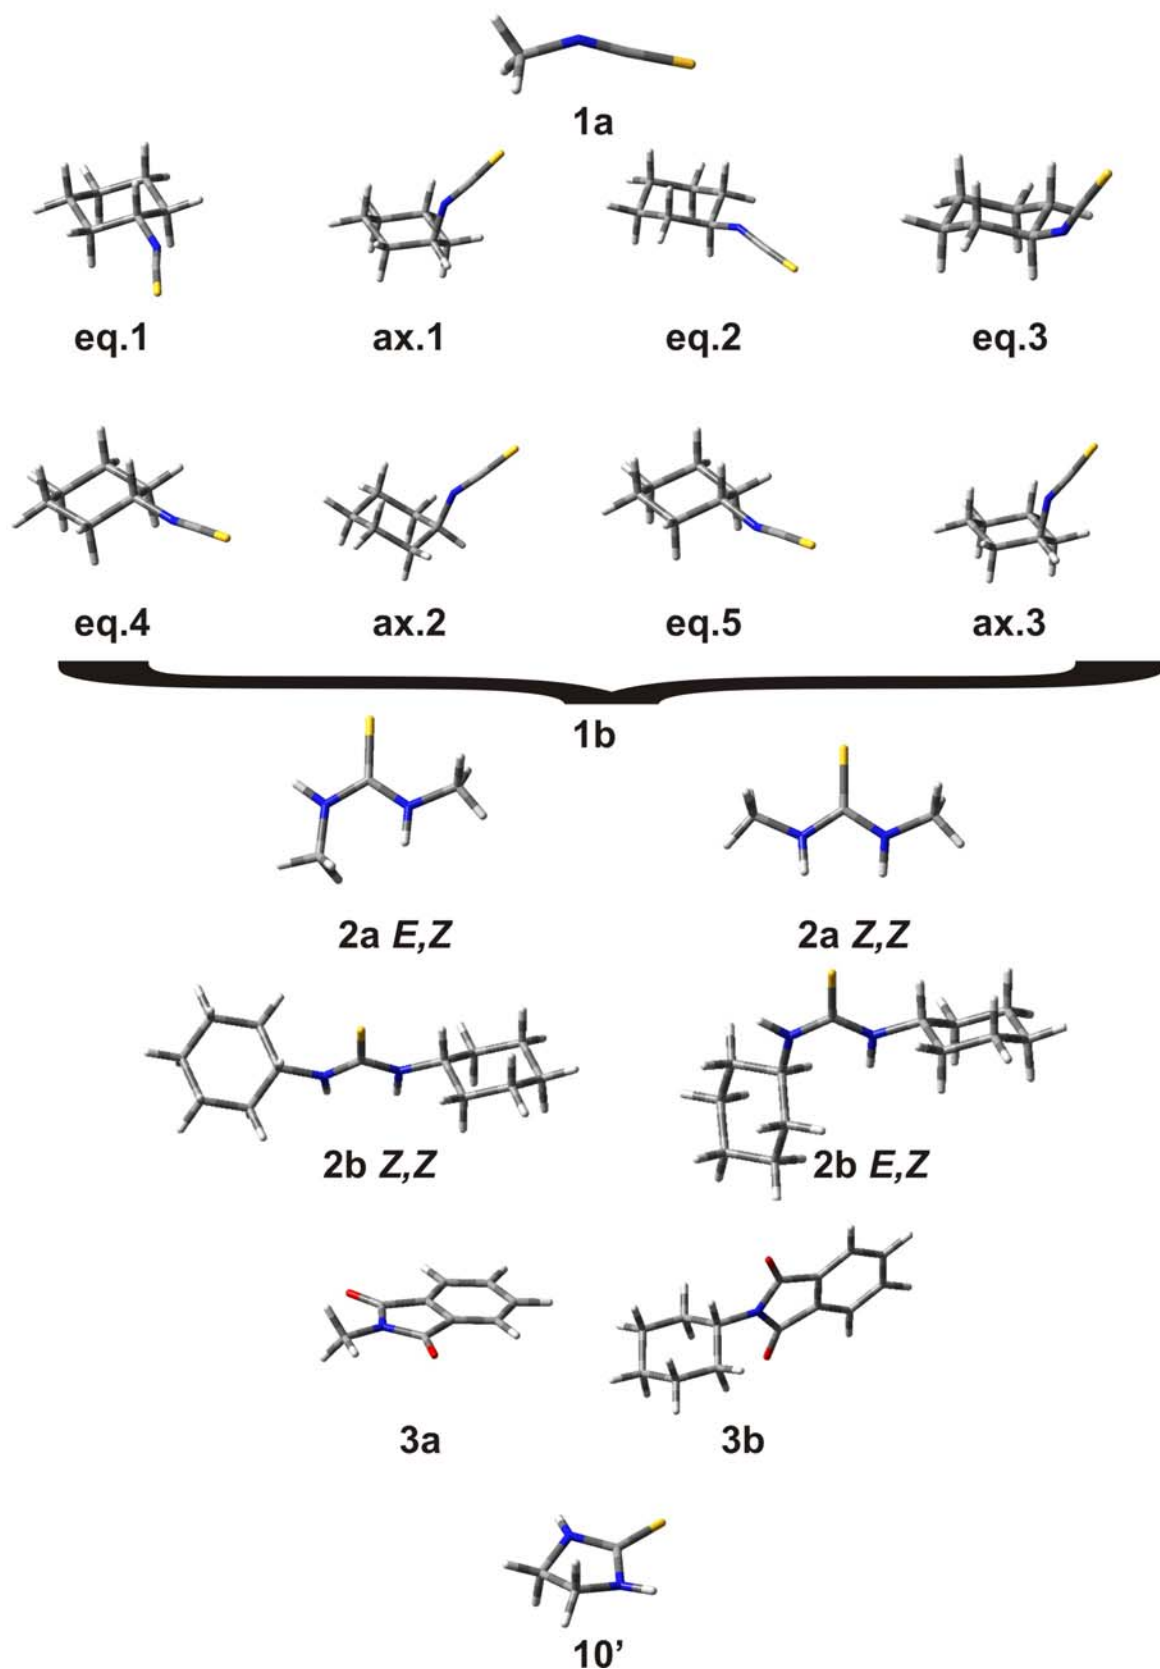

Figure A. Calculated at B3LYP/6-311++G(2D,2P) level structures of thermally accessible conformers of **1–3**, labeled according to their increasing energies

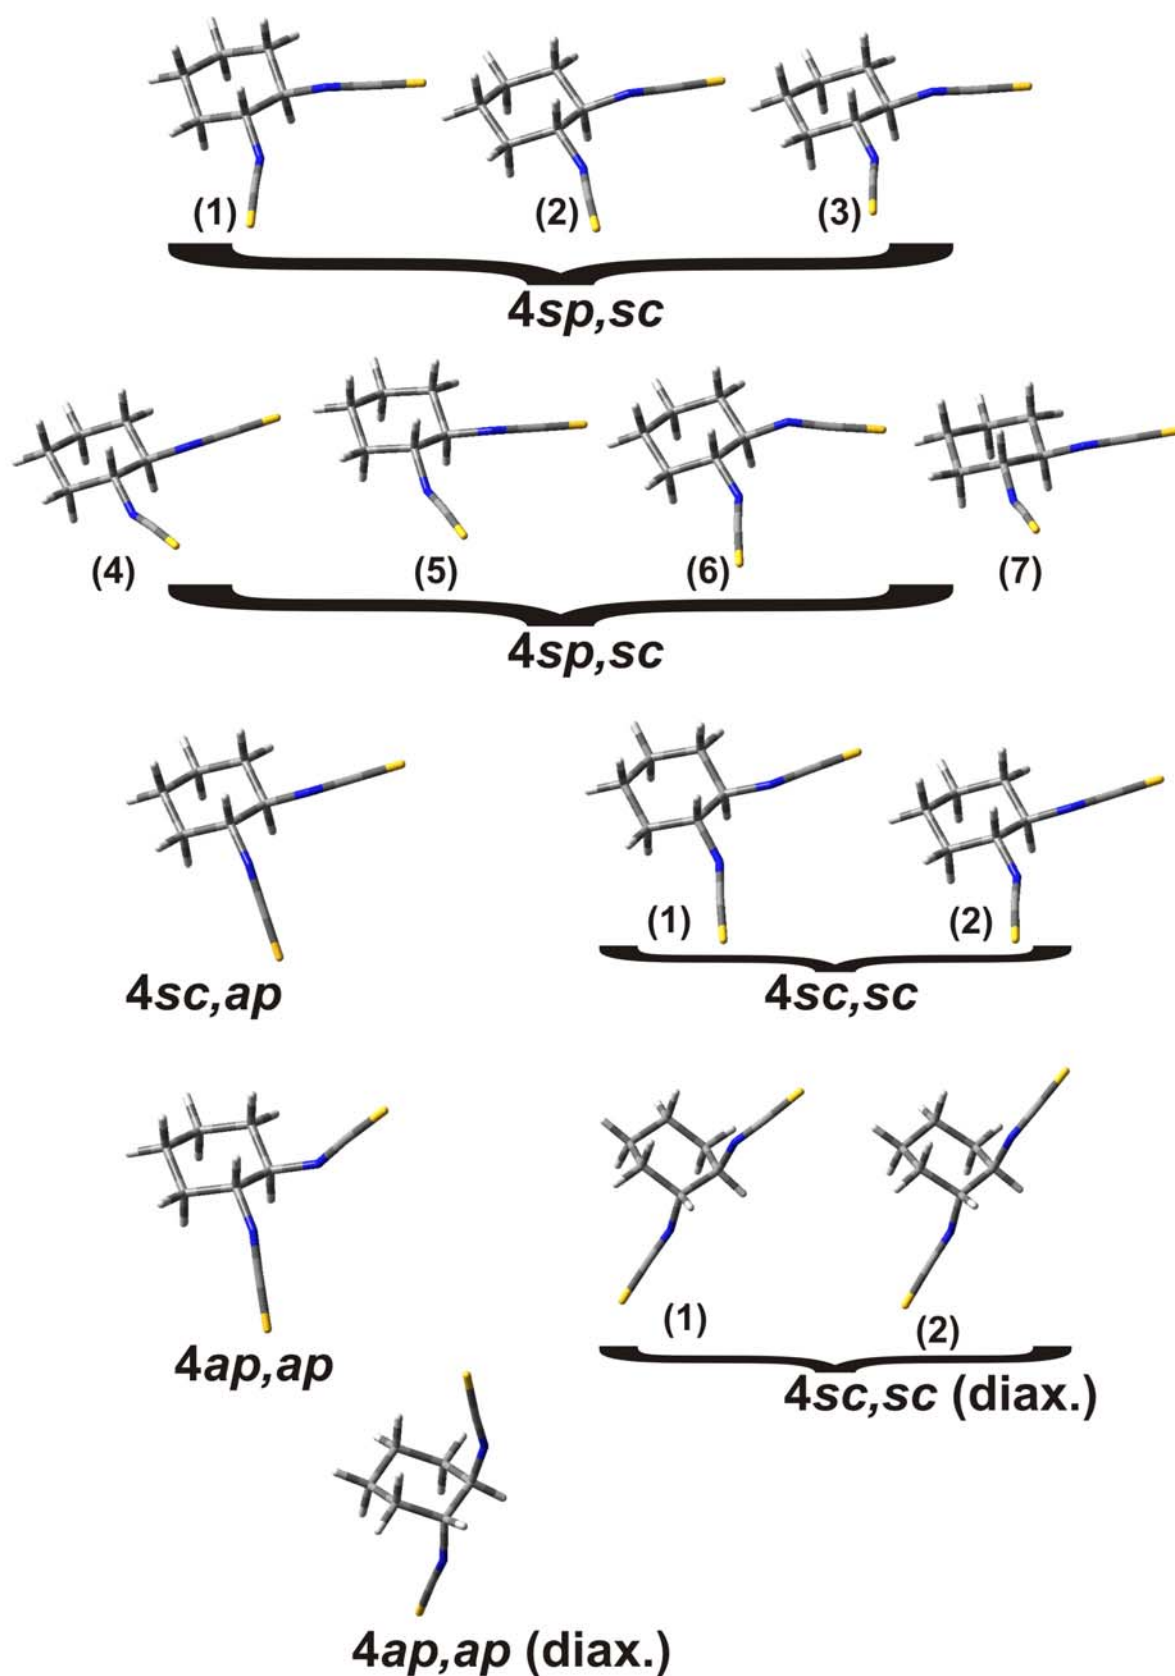

Figure B. Calculated at B3LYP/6-311++G(2D,2P) level structures of thermally accessible conformers of **4**. Note that conformers are labeled according to their structural similarity and increasing energies

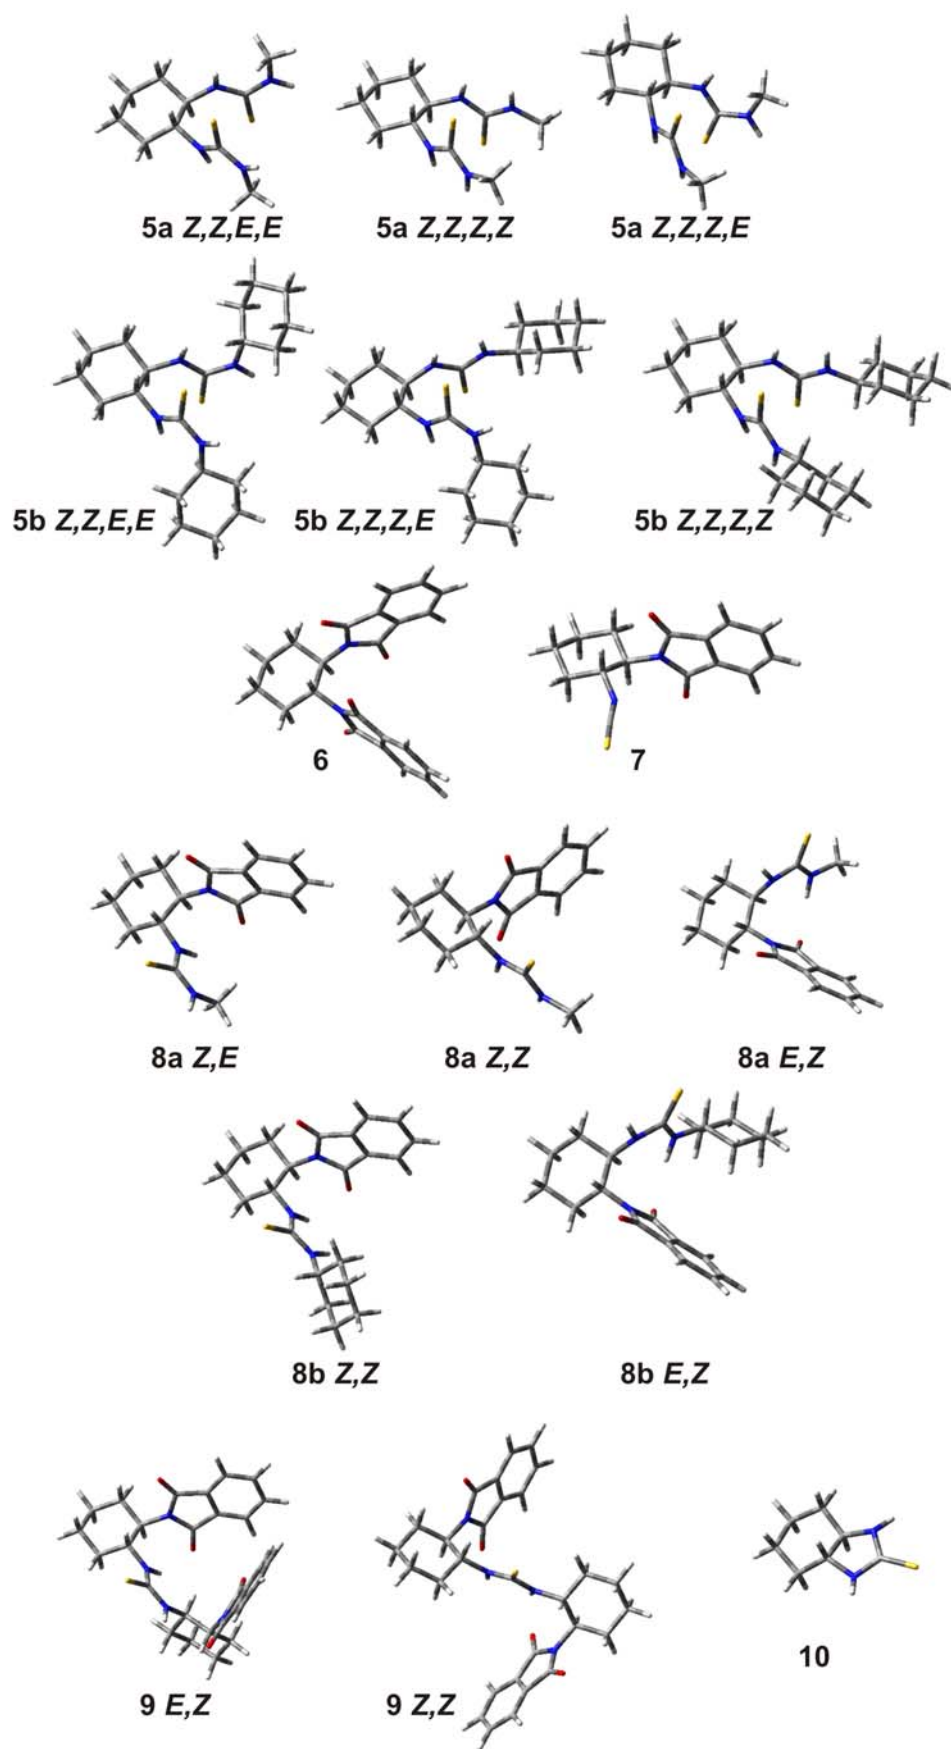

Figure C. Calculated at B3LYP/6-311++G(2D,2P) level structures of thermally accessible conformers of **5** – **10**.

(a)

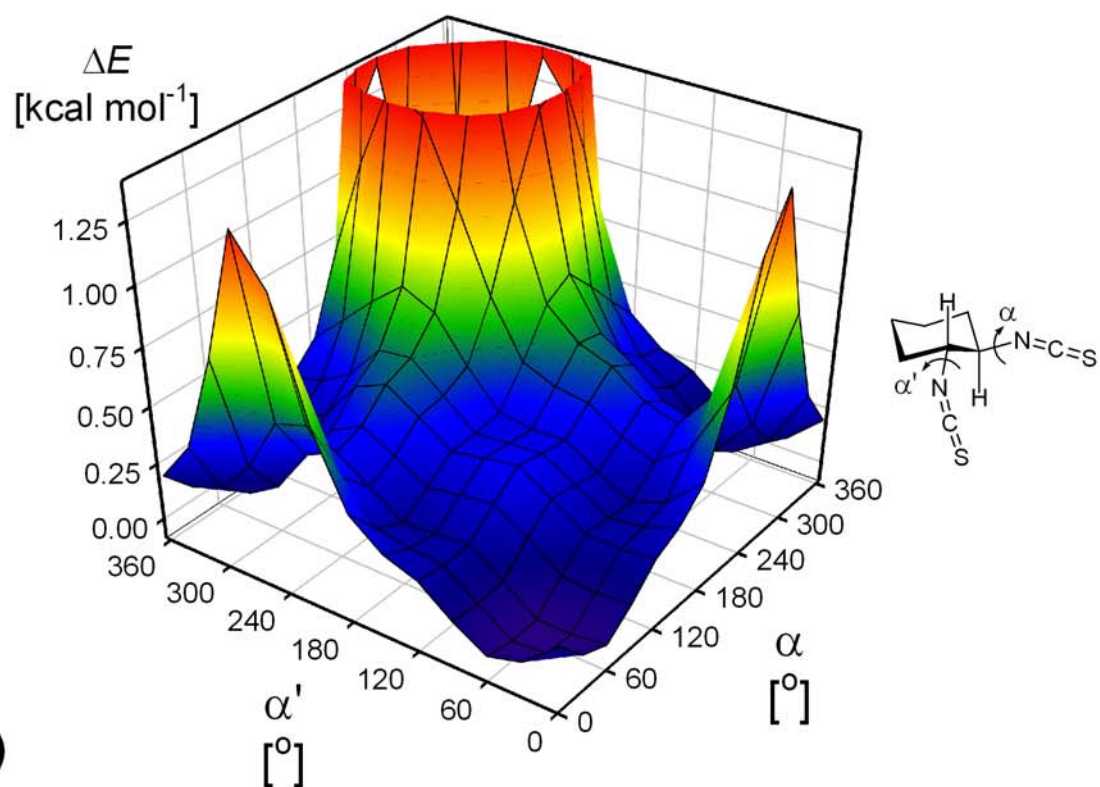

(b)

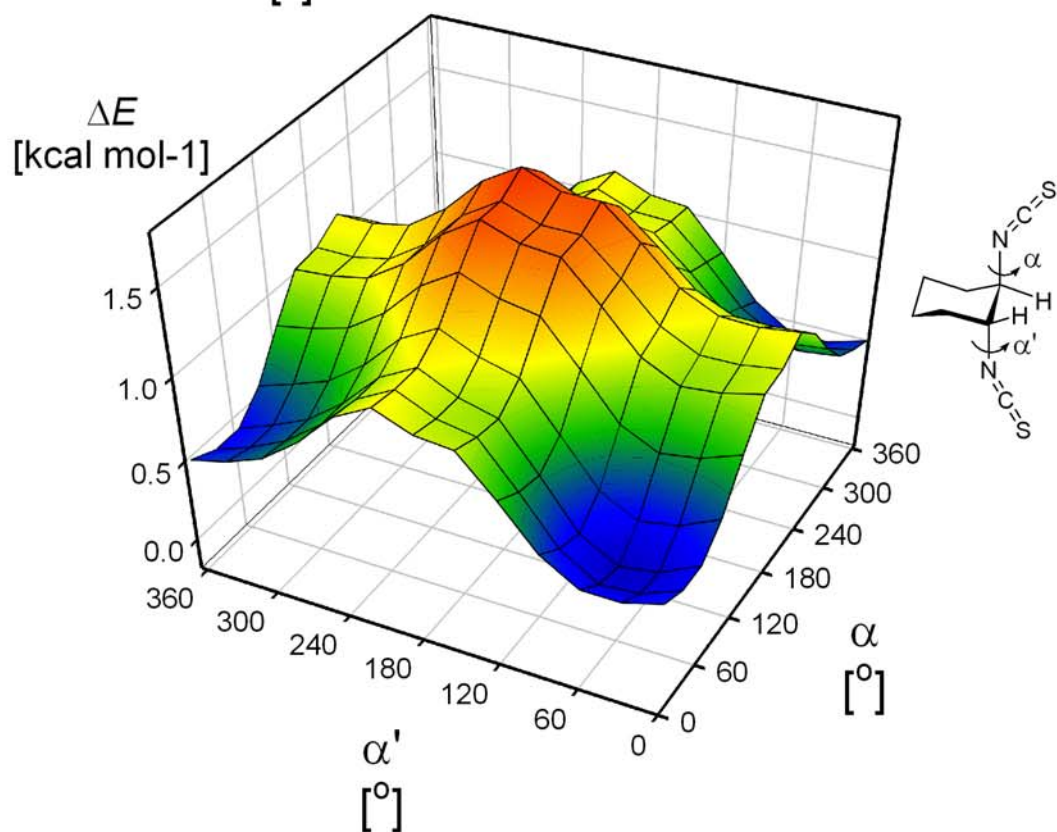

Figure D. Calculated at B3LYP/6-311++G(D,P) level PES for the rotation around the C–N bonds in diequatorial (a) and diaxial (b) conformations of **4**.

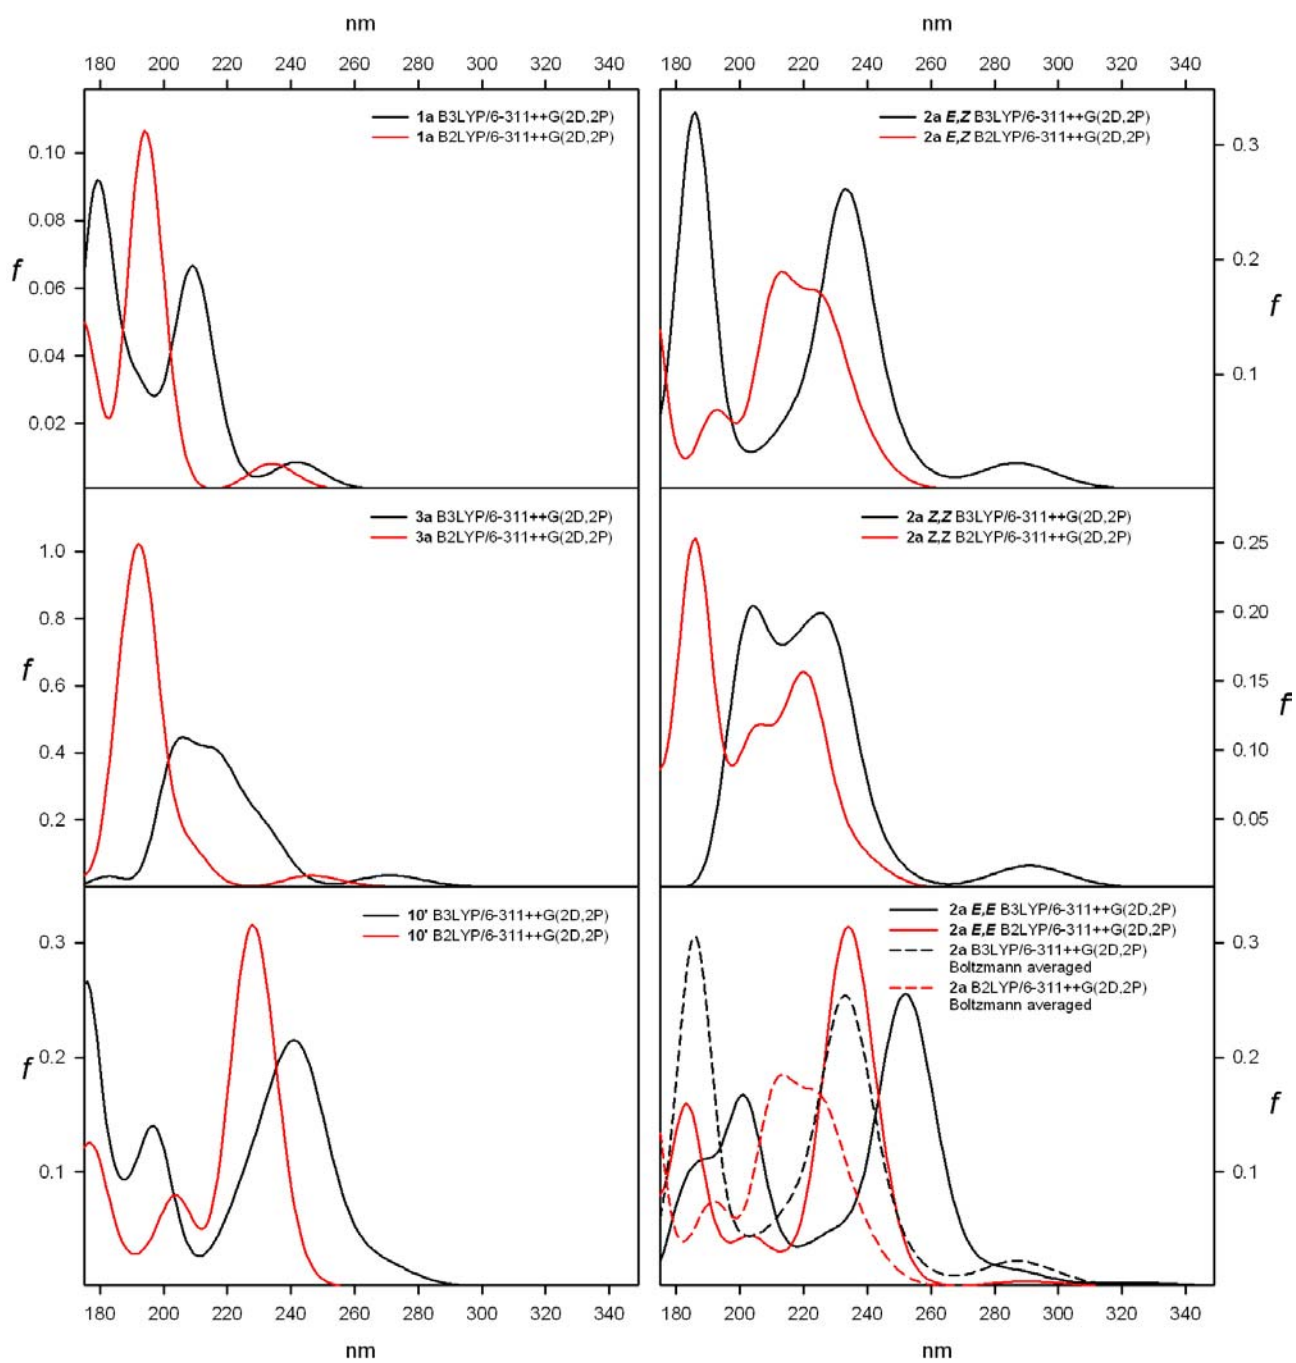

Figure E. Calculated at TDDFT/B3LYP/6-311++G(2D,2P) level of theory (black lines) and TDDFT/B2LYP/6-311++G(2D,2P) level of theory (red lines) UV spectra for model compounds **1a**, **2a**, **3a** and **10'** (wavelength not corrected).

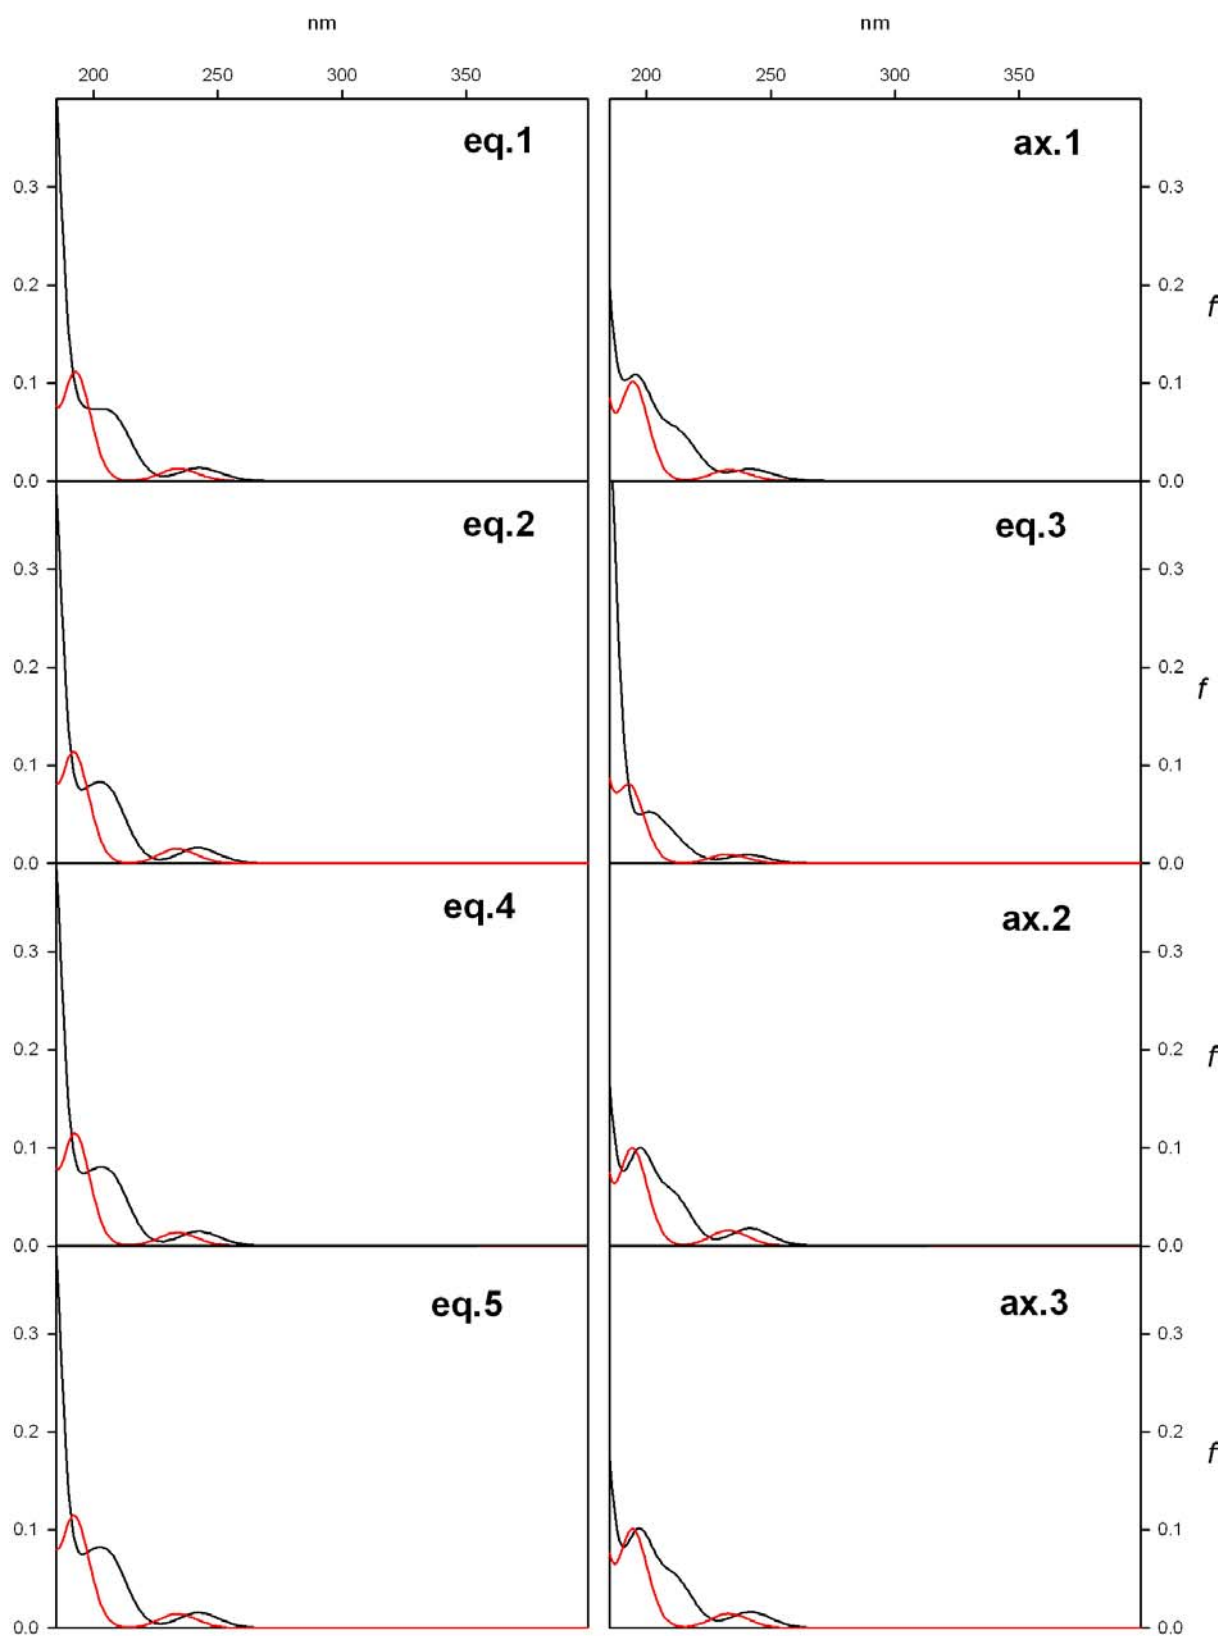

Figure F. Calculated at TDDFT/B3LYP/6-311++G(2D,2P) level of theory (black lines) and TDDFT/B2LYP/6-311++G(2D,2P) level of theory (red lines) UV spectra for individual conformers of **1b** (wavelength not corrected).



## Diequatorial conformers

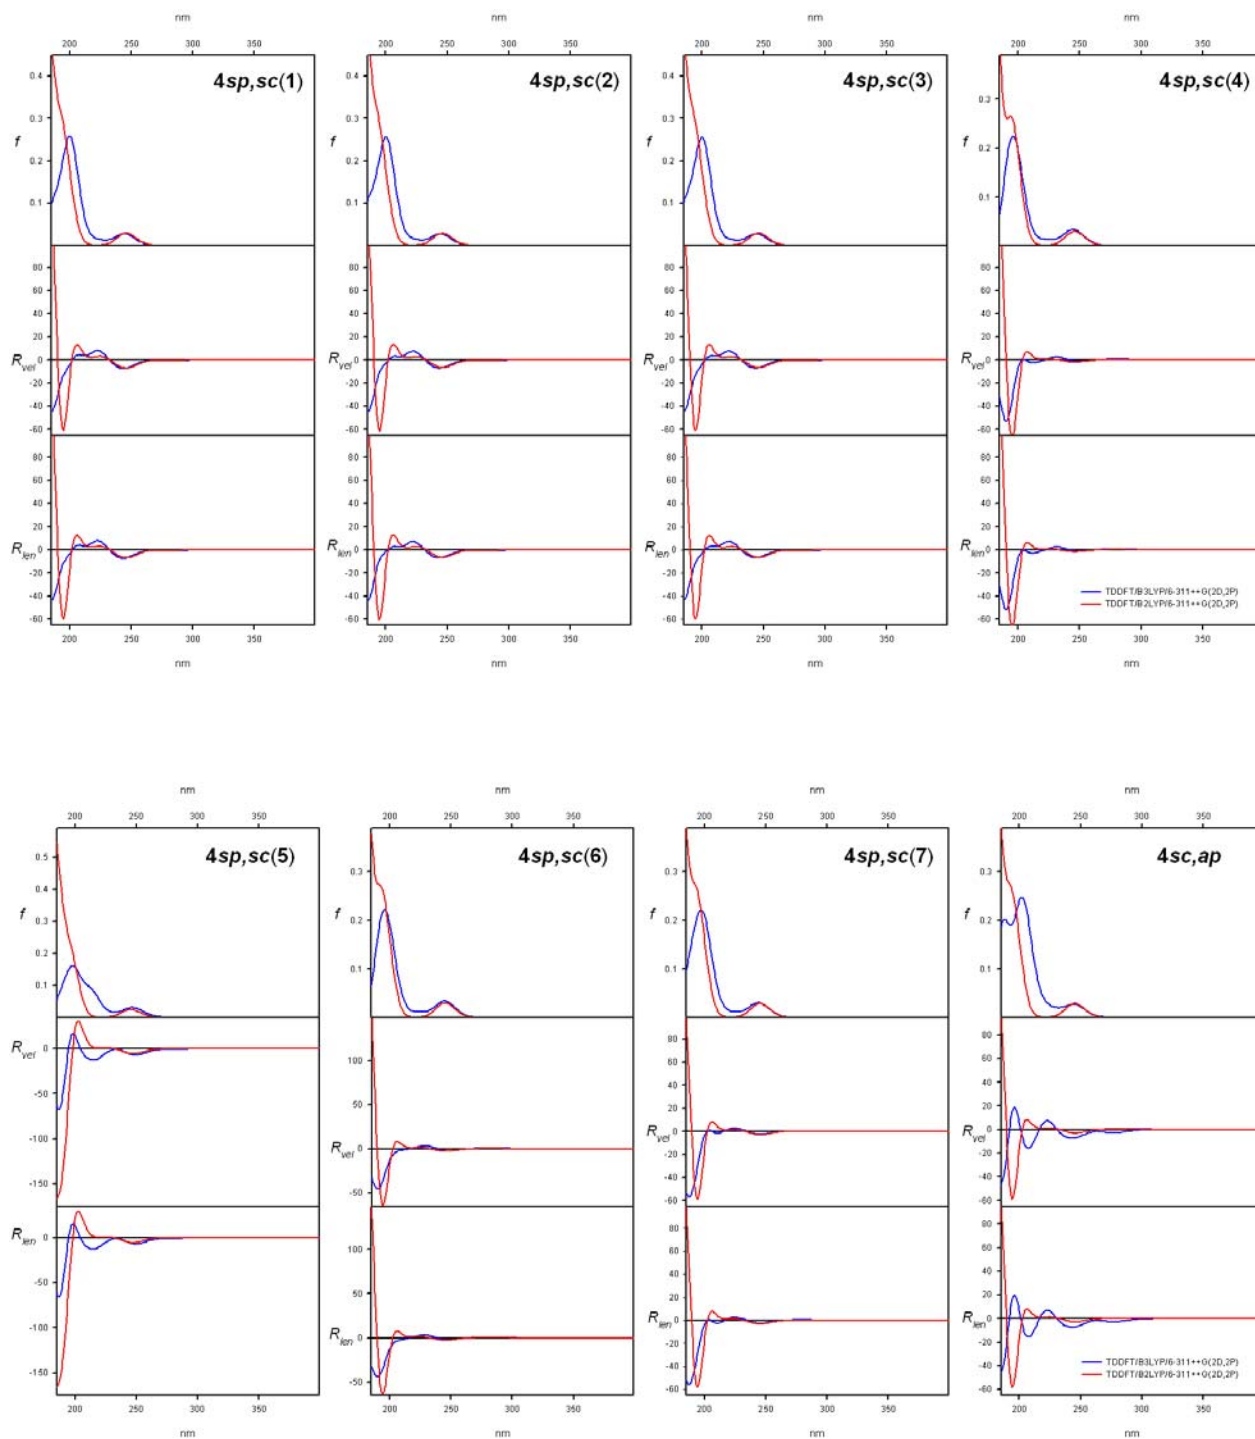

Continued on next page

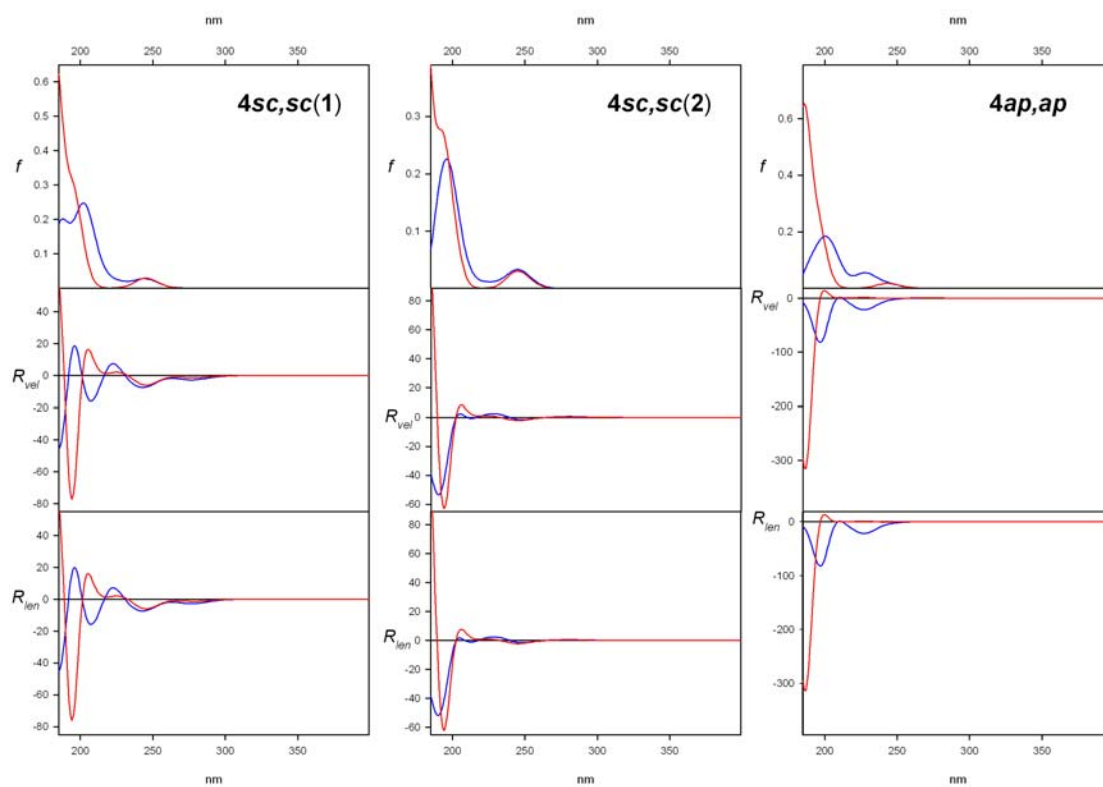

#### Diaxial conformers

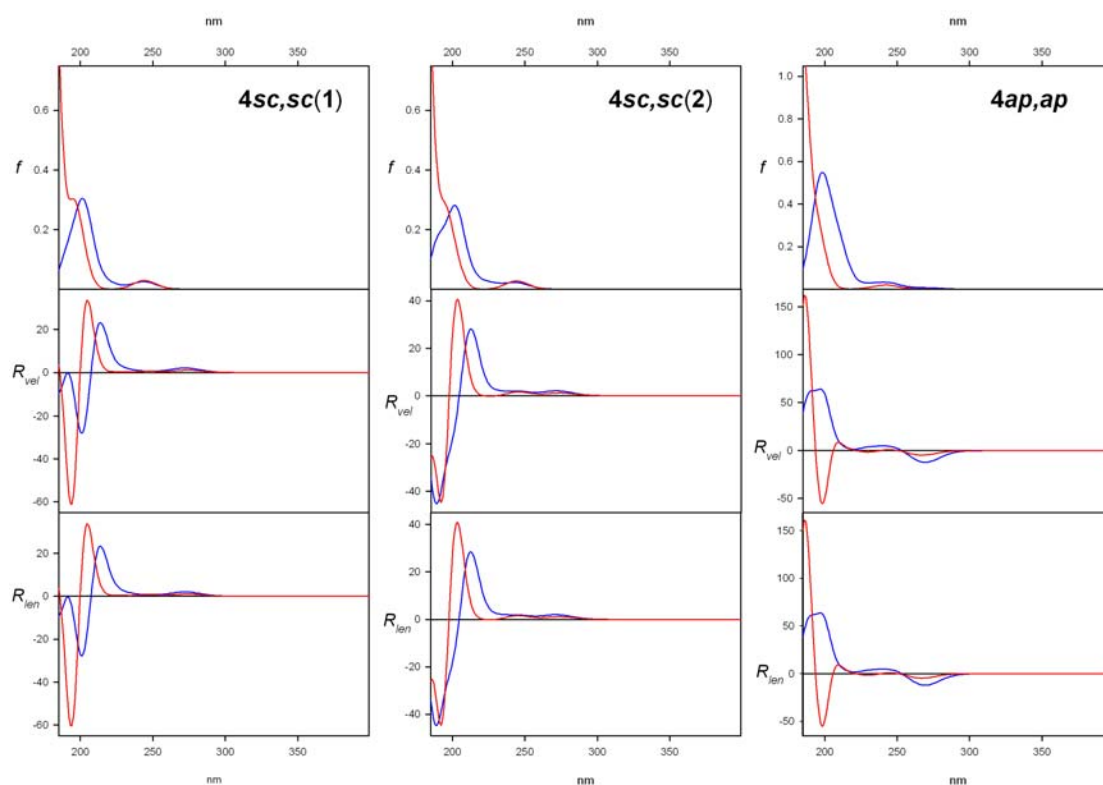

Figure G. Calculated at TDDFT/B3LYP/6-311++G(2D,2P) level of theory (blue lines) and TDDFT/BPLYP/6-311++G(2D,2P) level of theory (red lines) UV (upper panels) and CD (middle panels – velocity; lower panels – length method) spectra for individual conformers of **4**. All calculated spectra were wavelength corrected to match the experimental UV spectrum of **4**.

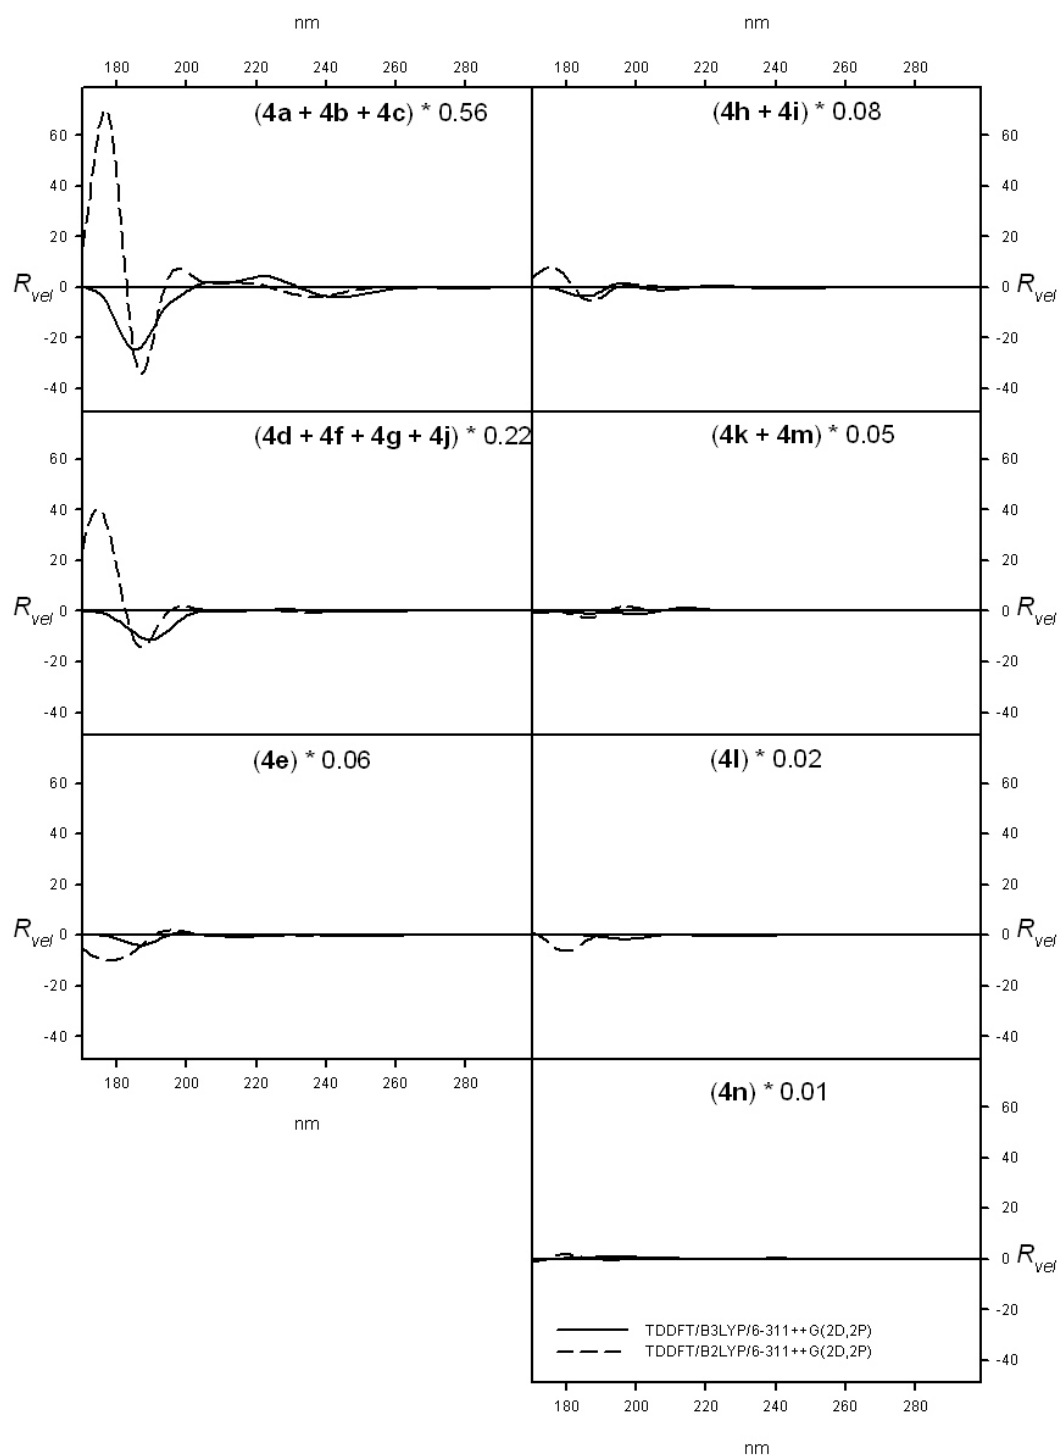

Figure H. Calculated at TDDFT/B3LYP/6-311++G(2D,2P) level of theory (solid lines) and TDDFT/B2LYP/6-311++G(2D,2P) level of theory (dashed lines) UV (upper panels) CD spectra for families of structurally similar conformers of compound **4**, normalized to their relative populations (wavelength not corrected).

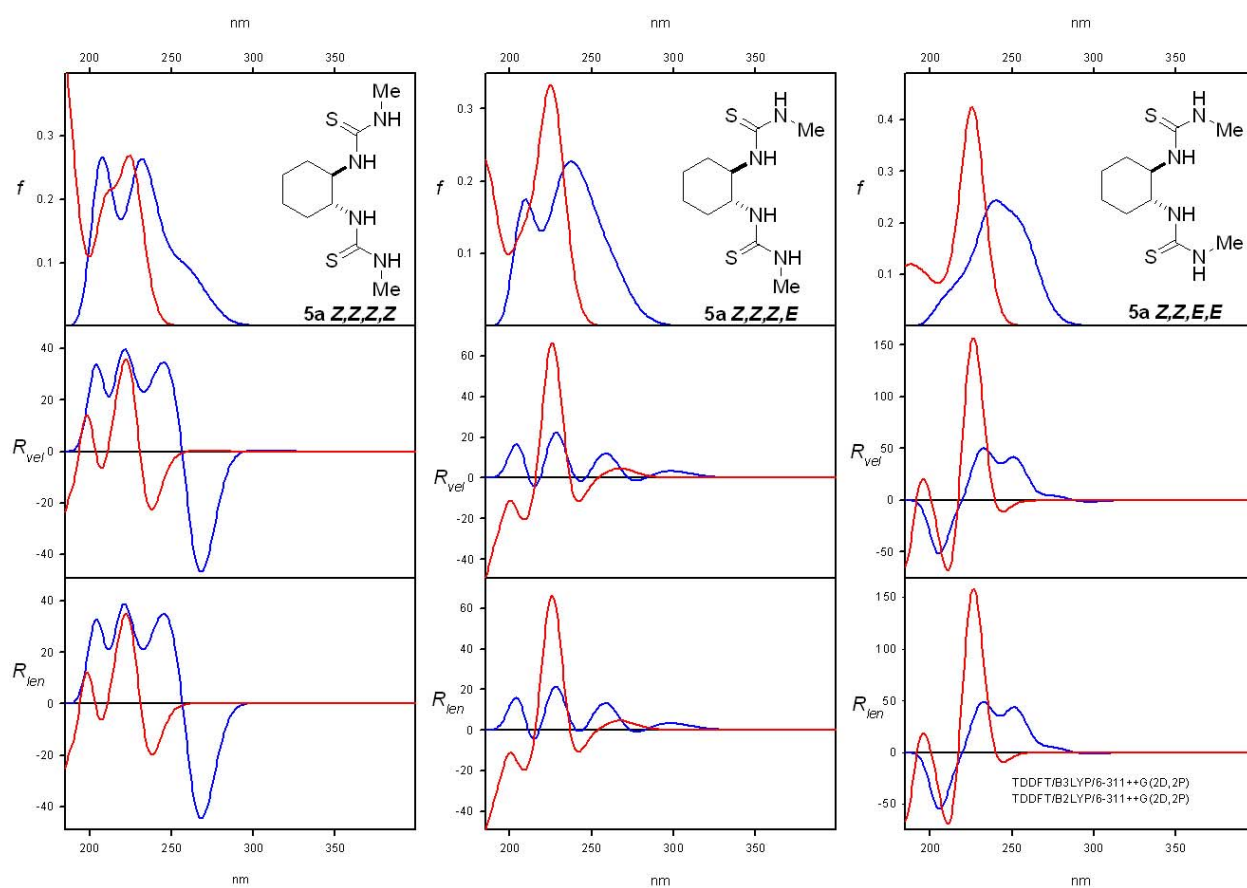

Figure I. Calculated at TDDFT/B3LYP/6-311++G(2D,2P) level of theory (blue lines) and TDDFT/B2LYP/6-311++G(2D,2P) level of theory (red lines) UV (upper panels) and CD (middle panels – velocity; lower panels – length method) spectra for individual conformers of **5a** (wavelength not corrected).

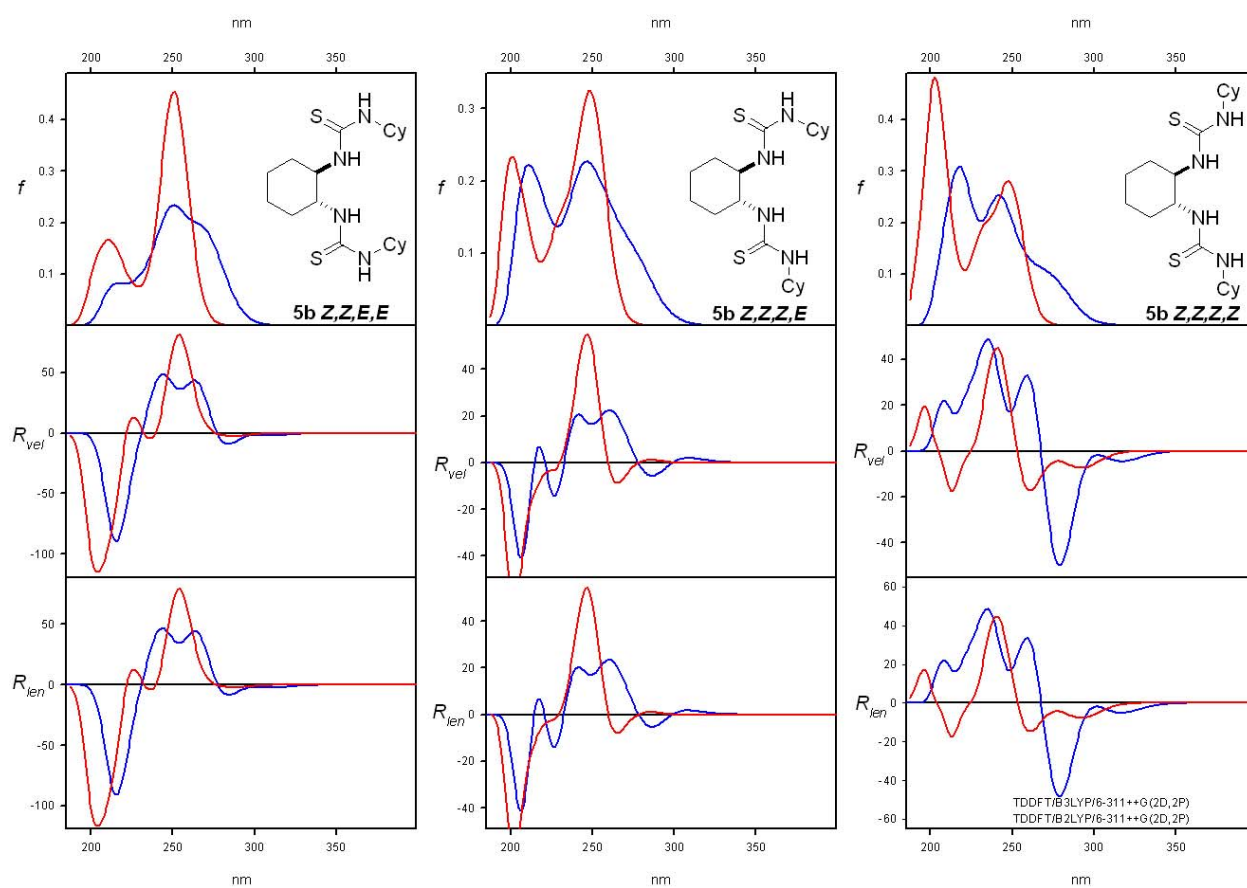

Figure J. Calculated at TDDFT/B3LYP/6-311++G(2D,2P) level of theory (blue lines) and TDDFT/B2LYP/6-311++G(2D,2P) level of theory (red lines) UV (upper panels) and CD (middle panels – velocity; lower panels – length method) spectra for individual conformers of **5b**. All calculated spectra were wavelength corrected to match the experimental UV spectrum of **5b**.

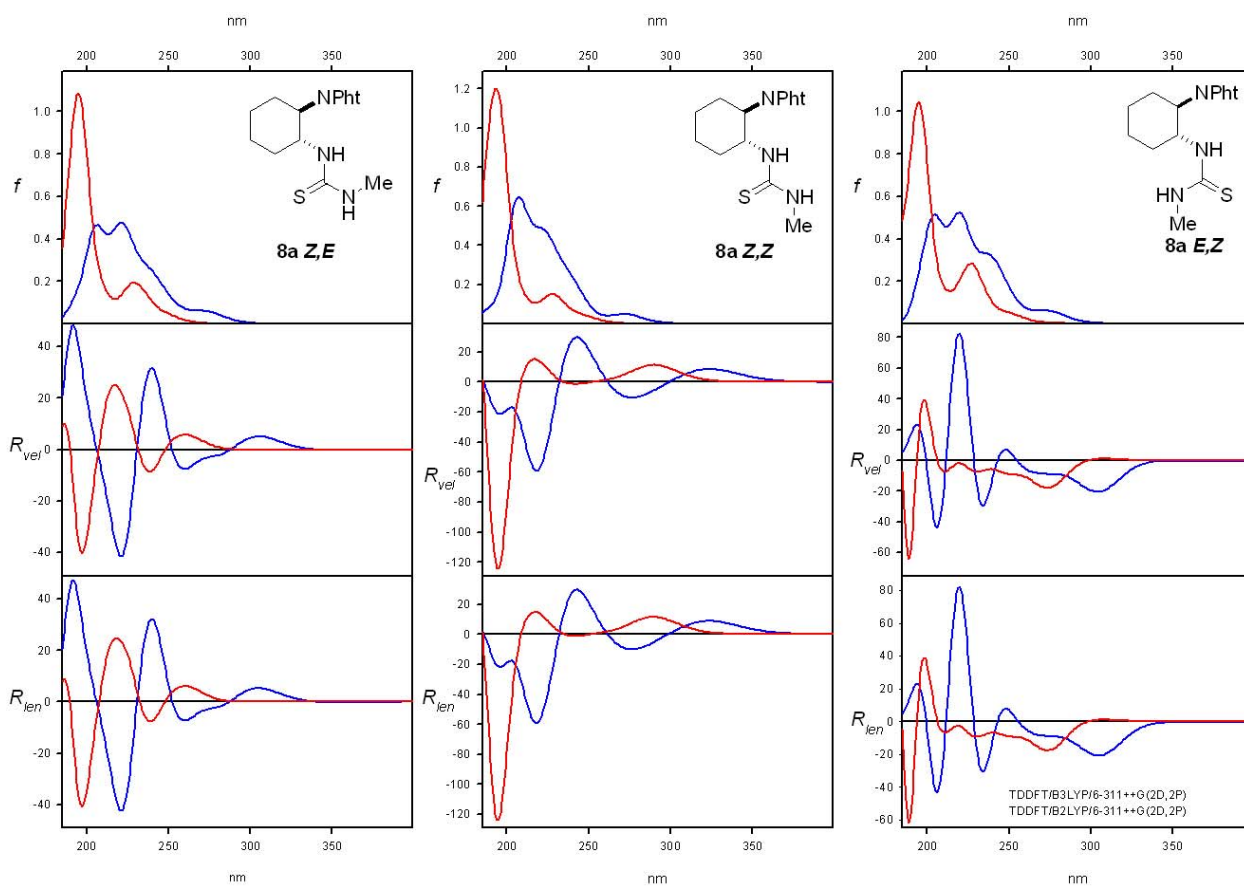

Figure K. Calculated at TDDFT/B3LYP/6-311++G(2D,2P) level of theory (blue lines) and TDDFT/B2LYP/6-311++G(2D,2P) level of theory (red lines) UV (upper panels) and CD (middle panels – velocity; lower panels – length method) spectra for individual conformers of **8a** (wavelength not corrected).

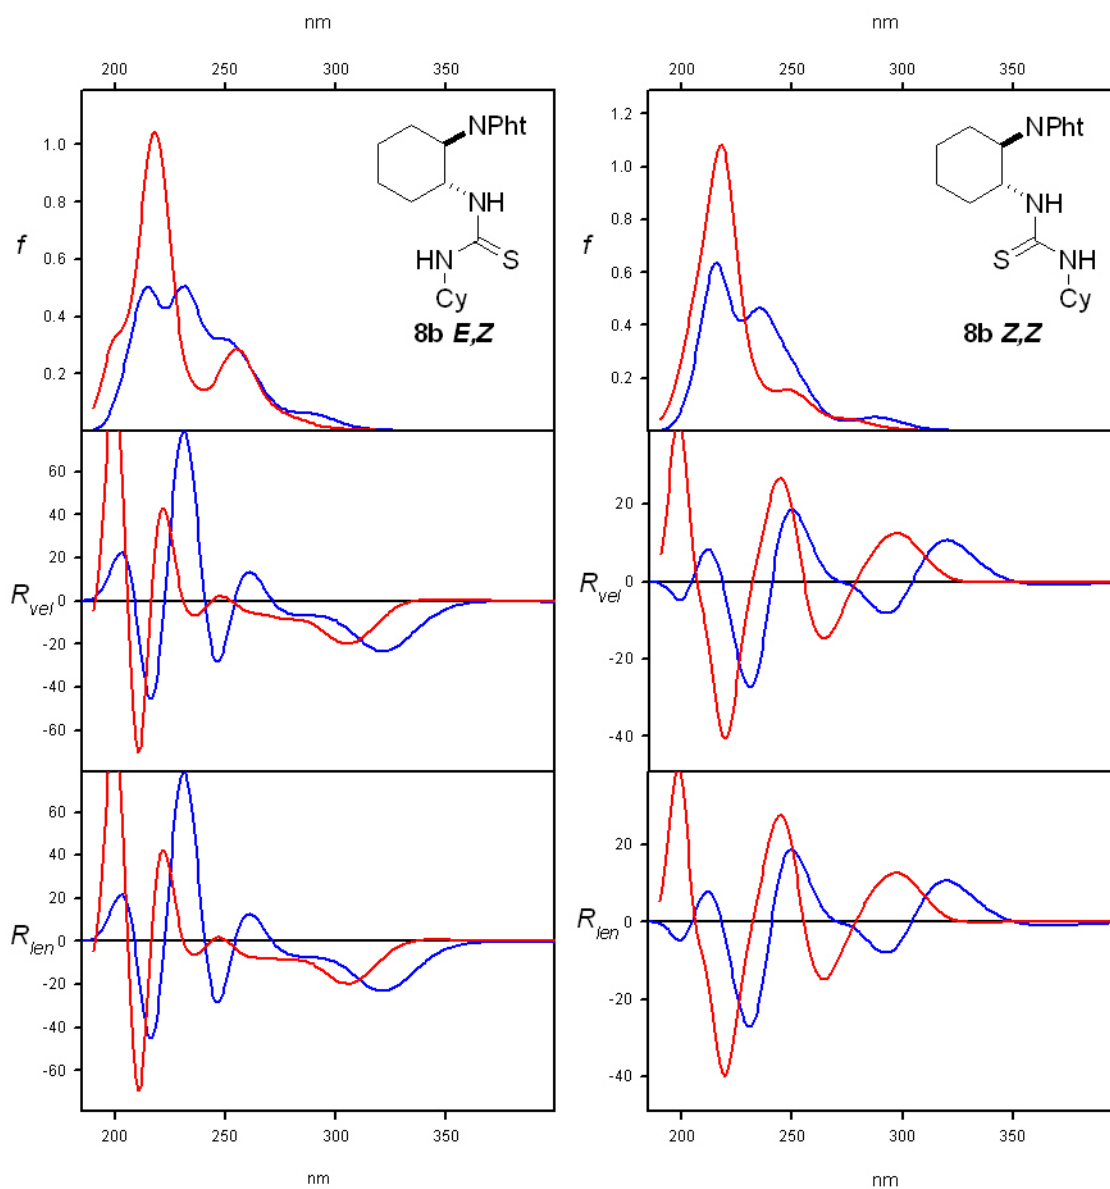

Figure L. Calculated at TDDFT/B3LYP/6-311++G(2D,2P) level of theory (blue lines) and TDDFT/B2LYP/6-311++G(2D,2P) level of theory (red lines) UV (upper panels) and CD (middle panels – velocity; lower panels – length method) spectra for individual conformers of **8b**. All calculated spectra were wavelength corrected to match the experimental UV spectrum of **8b**.

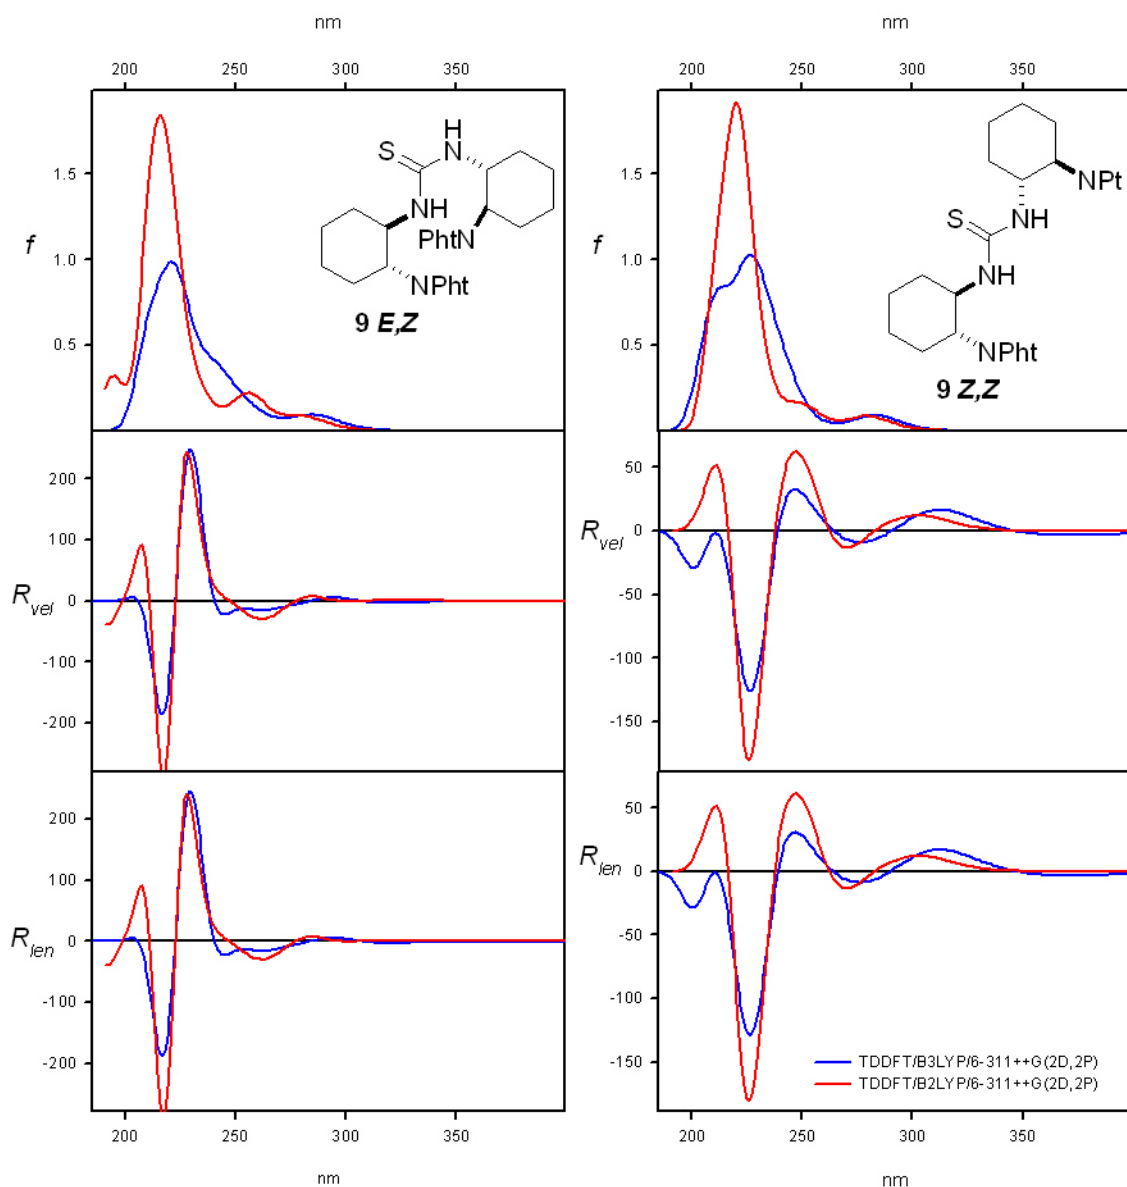

Figure M. Calculated at TDDFT/B3LYP/6-311++G(2D,2P) level of theory (blue lines) and TDDFT/B2LYP/6-311++G(2D,2P) level of theory (red lines) UV (upper panels) and CD (middle panels – velocity; lower panels – length method) spectra for individual conformers of **9**. All calculated spectra were wavelength corrected to match the experimental UV spectrum of **9**.



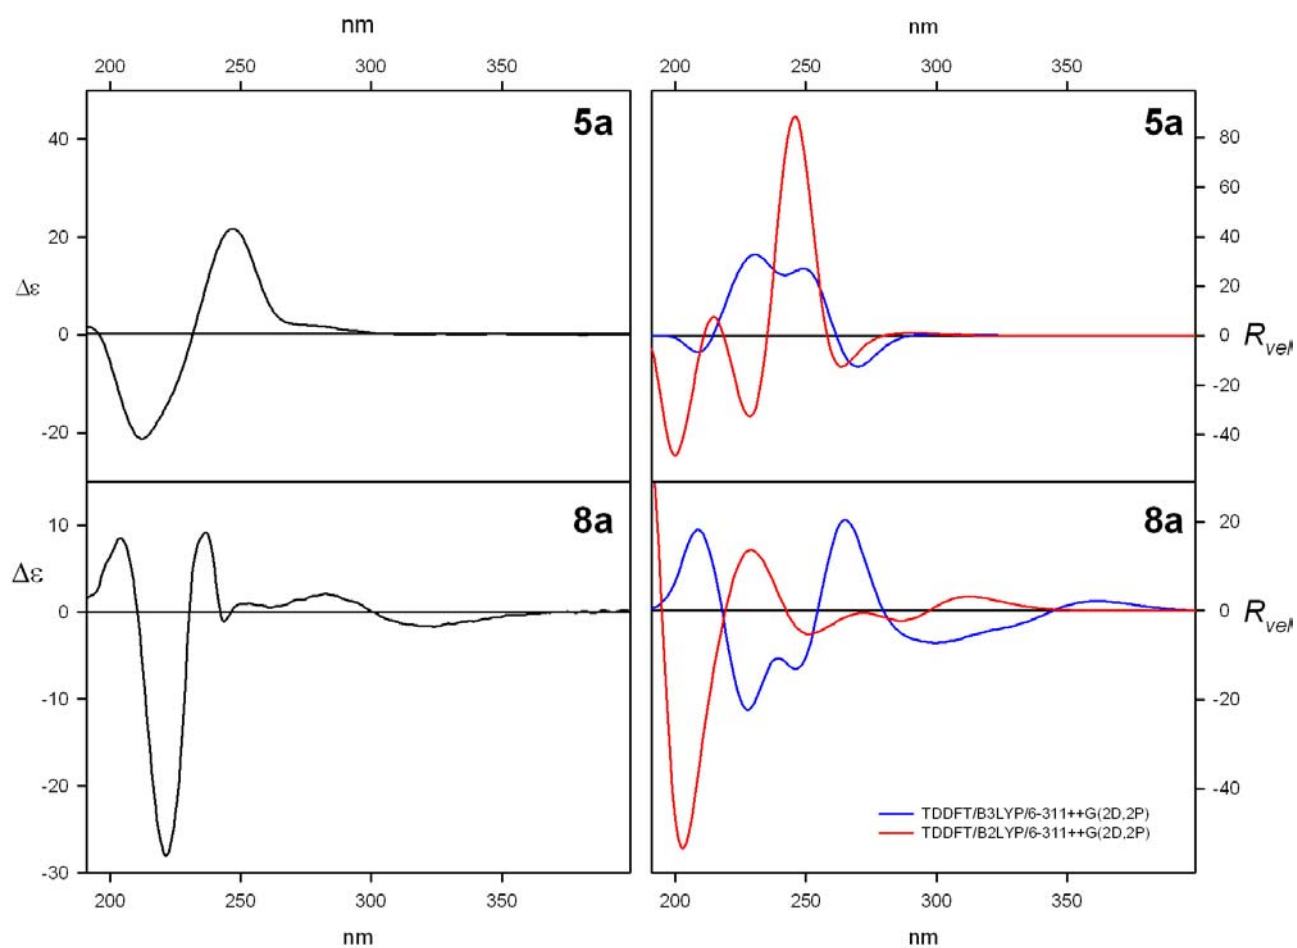

Figure N. Experimental (black lines, left panels) and calculated at TDDFT/B3LYP/6-311++G(2D,2P) level of theory (blue lines) and TDDFT/B2LYP/6-311++G(2D,2P) level of theory (red lines, right panels) CD spectra for of **5a** (upper panels) and **8a** (lower panels). All calculated spectra were wavelength corrected to match the experimental UV spectra of **5a** and **8a**.

compound 5a

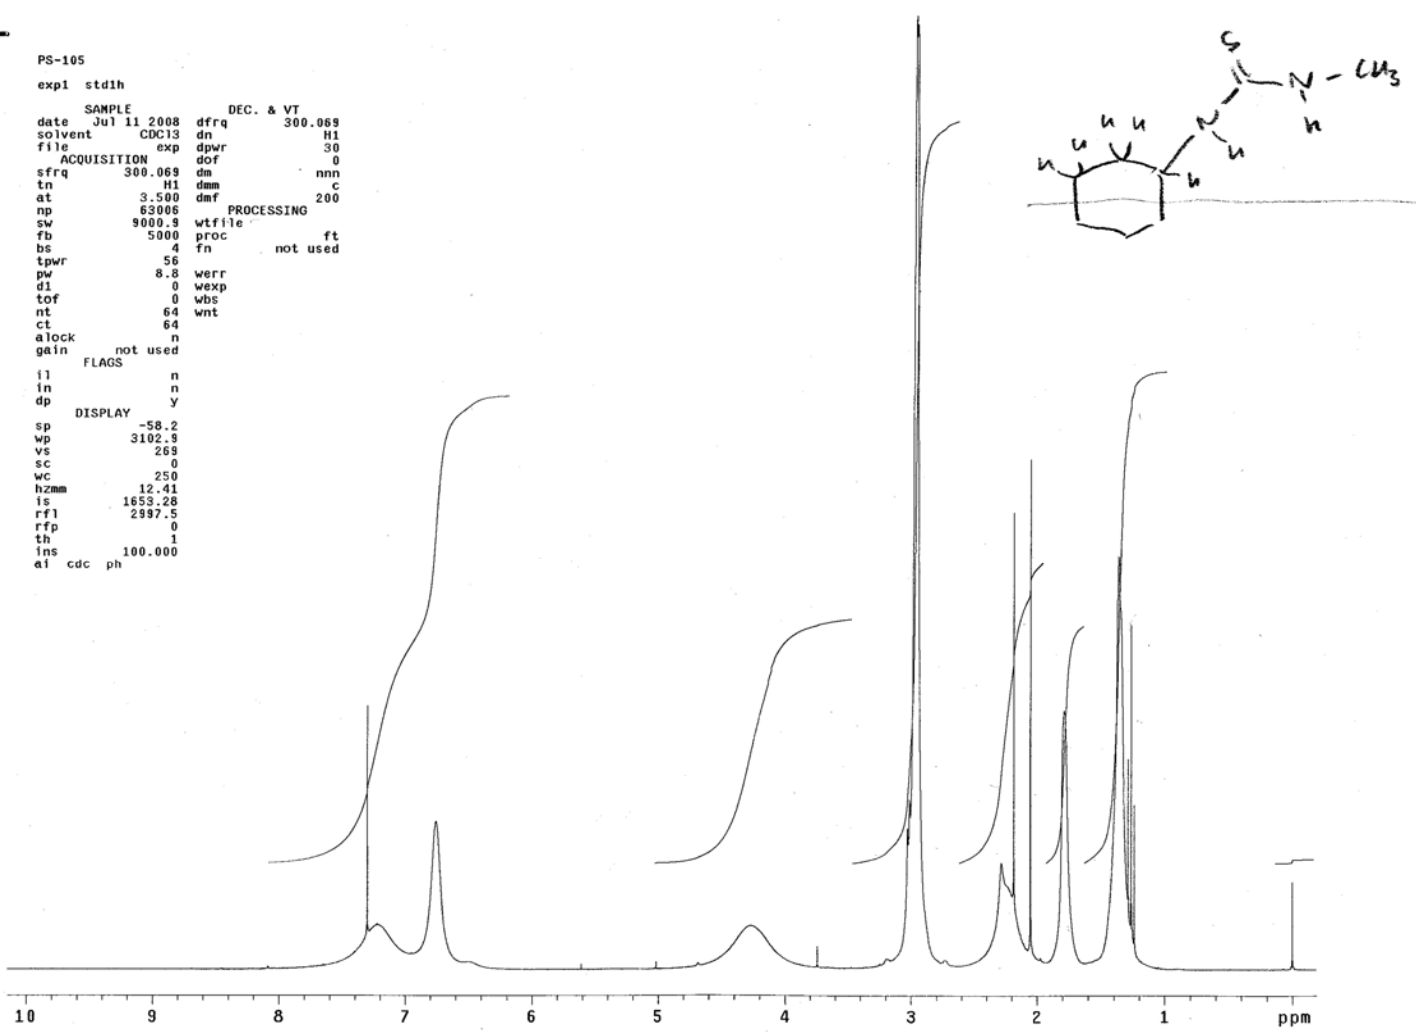

```

TPSOM
exp2 std13c
SAMPLE
date Jul 3 2008 dfrq 300.069
solvent cdc13 dn H1
file exp dpwr 40
ACQUISITION dof 0
sfrq 75.459 dm yyy
tn C13 dmm w
at 1.500 dmf 12000
np 67720 PROCESSING
sw 22573.4 lb 1.00
fb 12400 wifile
bs 4 proc ft
tpwr 61 fn 131072
pw 9.3
d1 0 werr
tof 27.7 wexp
nt 1e+07 wbs
ct 2472 wnt
alock n
gain not used
FLAGS
il n
ln n
dp y
DISPLAY
sp 962.7
wp 12391.2
vs 115
sc 0
wc 250
hzmm 49.56
ls 2642.27
rf1 8921.8
rfp 5809.8
th 6
ins 100.000
nm no ph

```

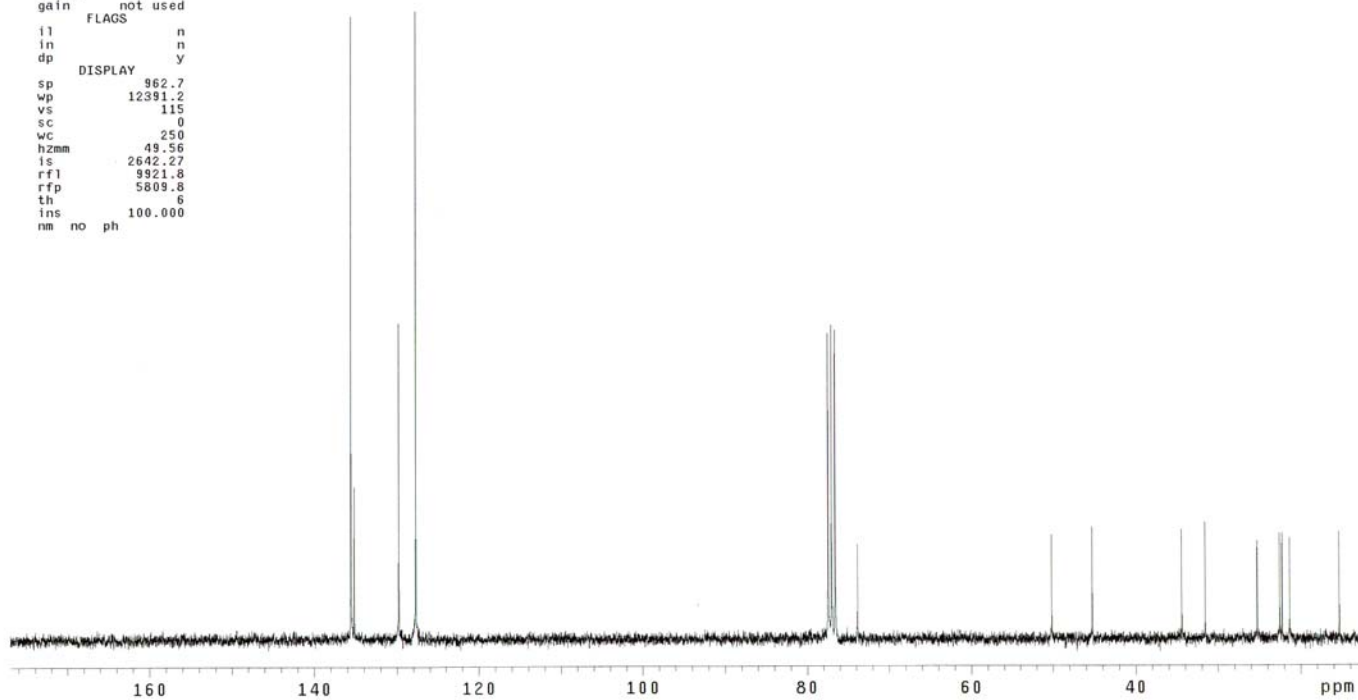

File Name : c:\samples\dsf06789.mss  
Creation Date/Time : 8.9.08 at 11:09:35  
File Type : Lo-Res Mass Data (Centroid)  
File Source : Acquired on MASPEC system [msw/96A2]  
File Title : PS-105 /NBA  
Operator : D.Siatkowska  
Instrument : AMD 604

SCAN GRAPH. Flagging=M/z.

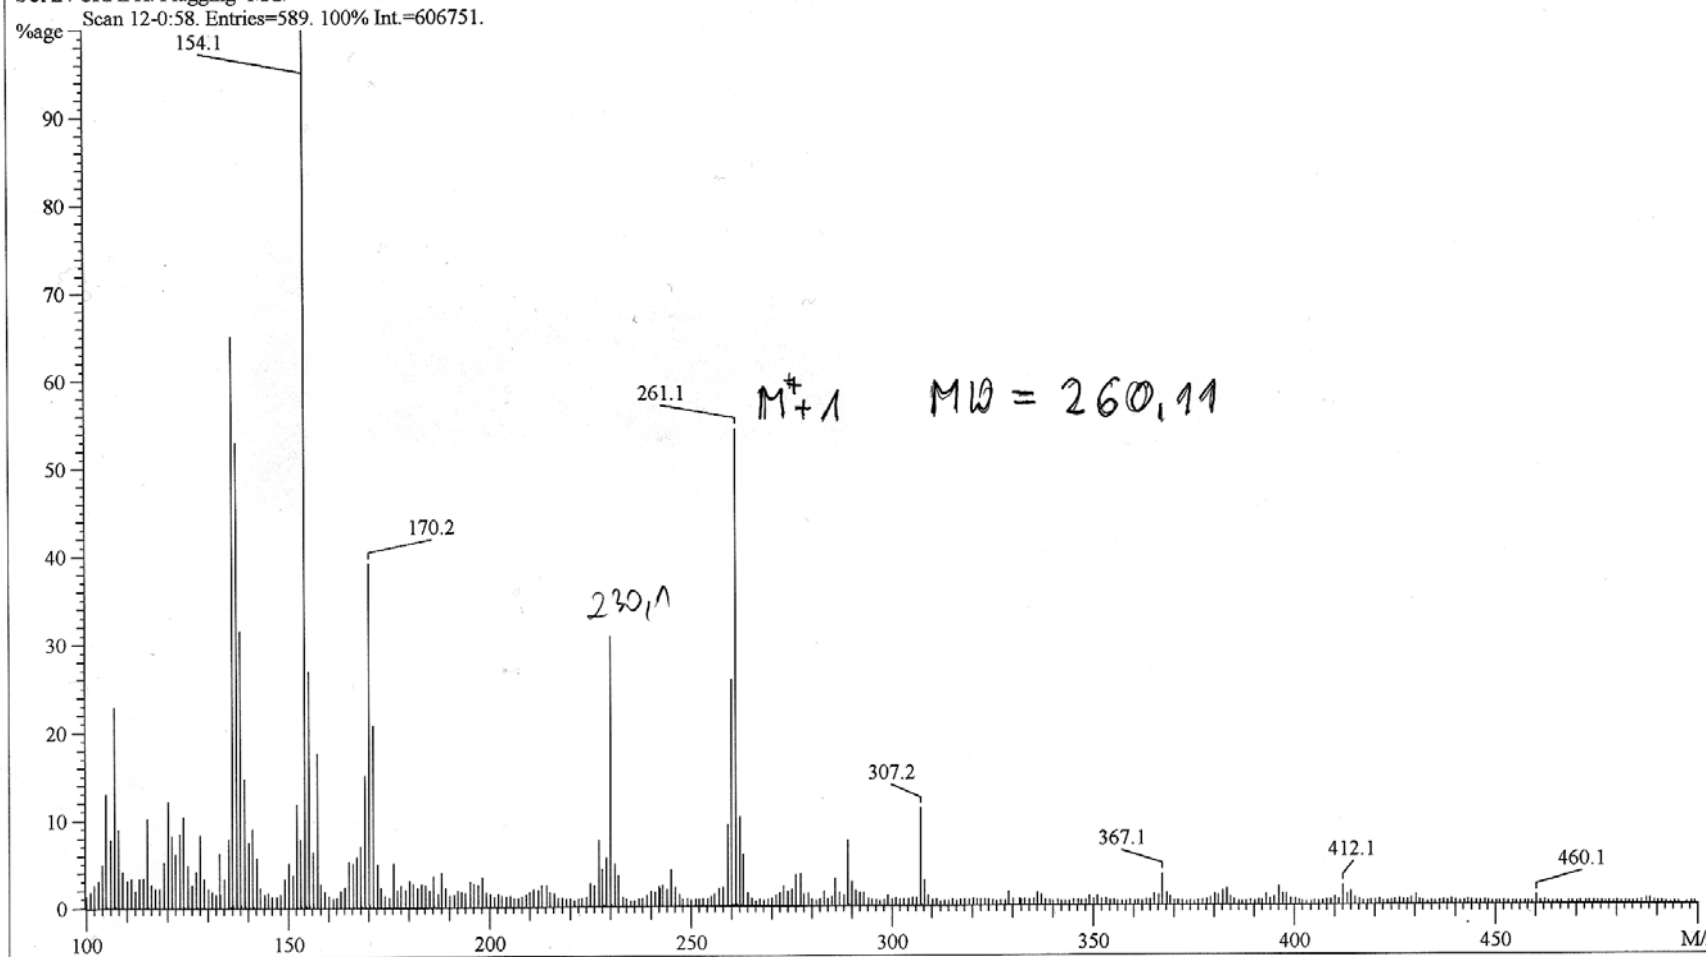

Compound 5b

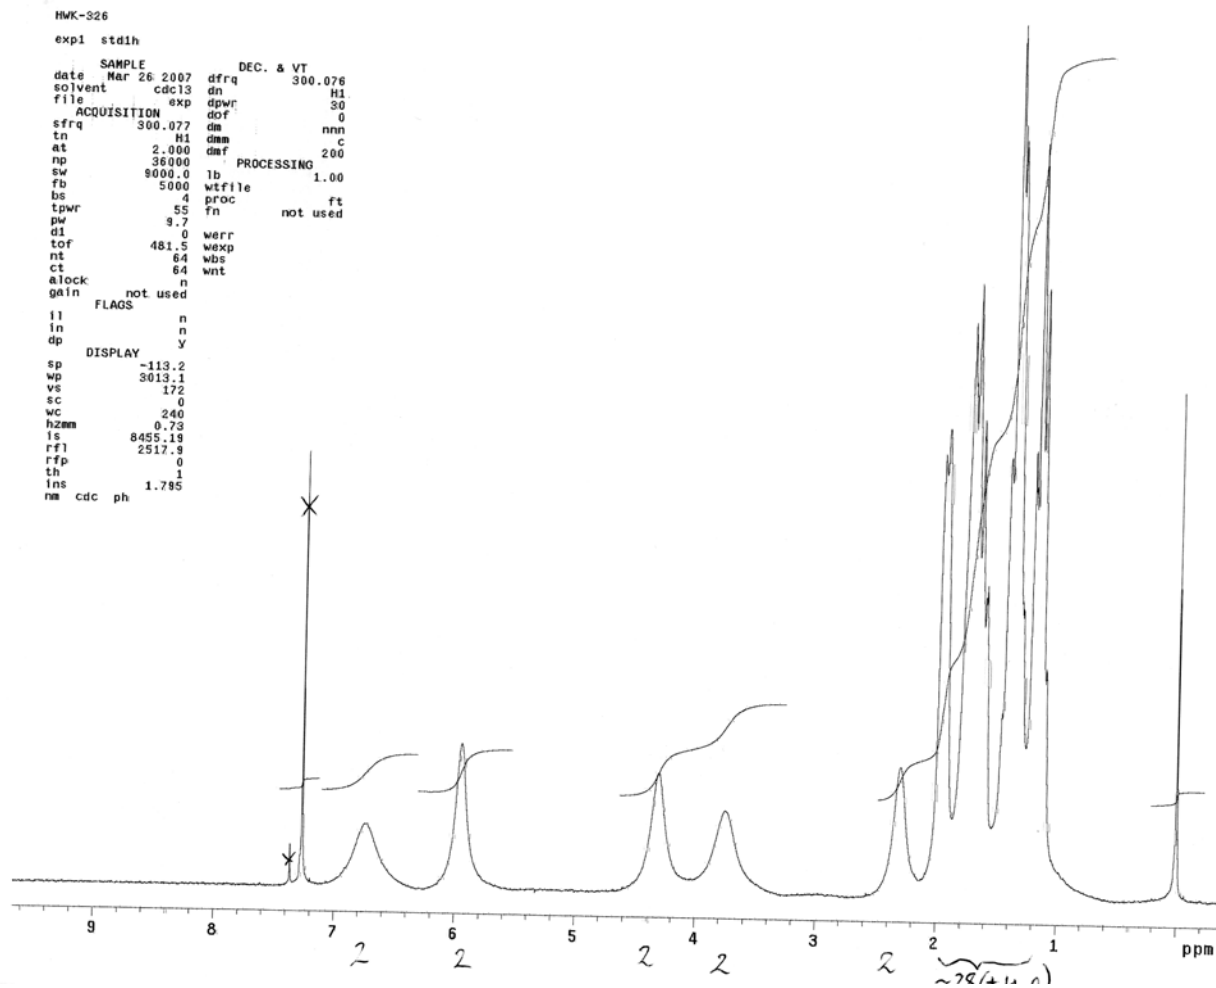

HWK 326

exp2 std13c

```
SAMPLE          DEC. & VT
date Jul 25 2008 dfrq      300.069
solvent cdc13  dn         H1
file      exp  dpwr       40
ACQUISITION    dof       0
sfrq      75.459 dm        yyv
tn         C13  dmm        w
at         1.500 dmf       12000
np         67720
sw         22573.4 lb      PROCESSING 1.00
fb         12400 wtfile
bs         4      proc      ft
tpwr      61     fn        131072
pw         9.3
d1         0      werr
tof        27.7 wexp
nt         1e+08 wbs
ct         38680 wnt
a1ock     n
gain      not used
FLAGS
il         n
in         n
dp         y
DISPLAY
sp         -361.0
wp         15924.1
vs         211
sc         0
wc         250
hzmm      63.70
is         2642.27
rf1        9922.5
rfp        5809.8
th         2
lms       100.000
nm no ph
```

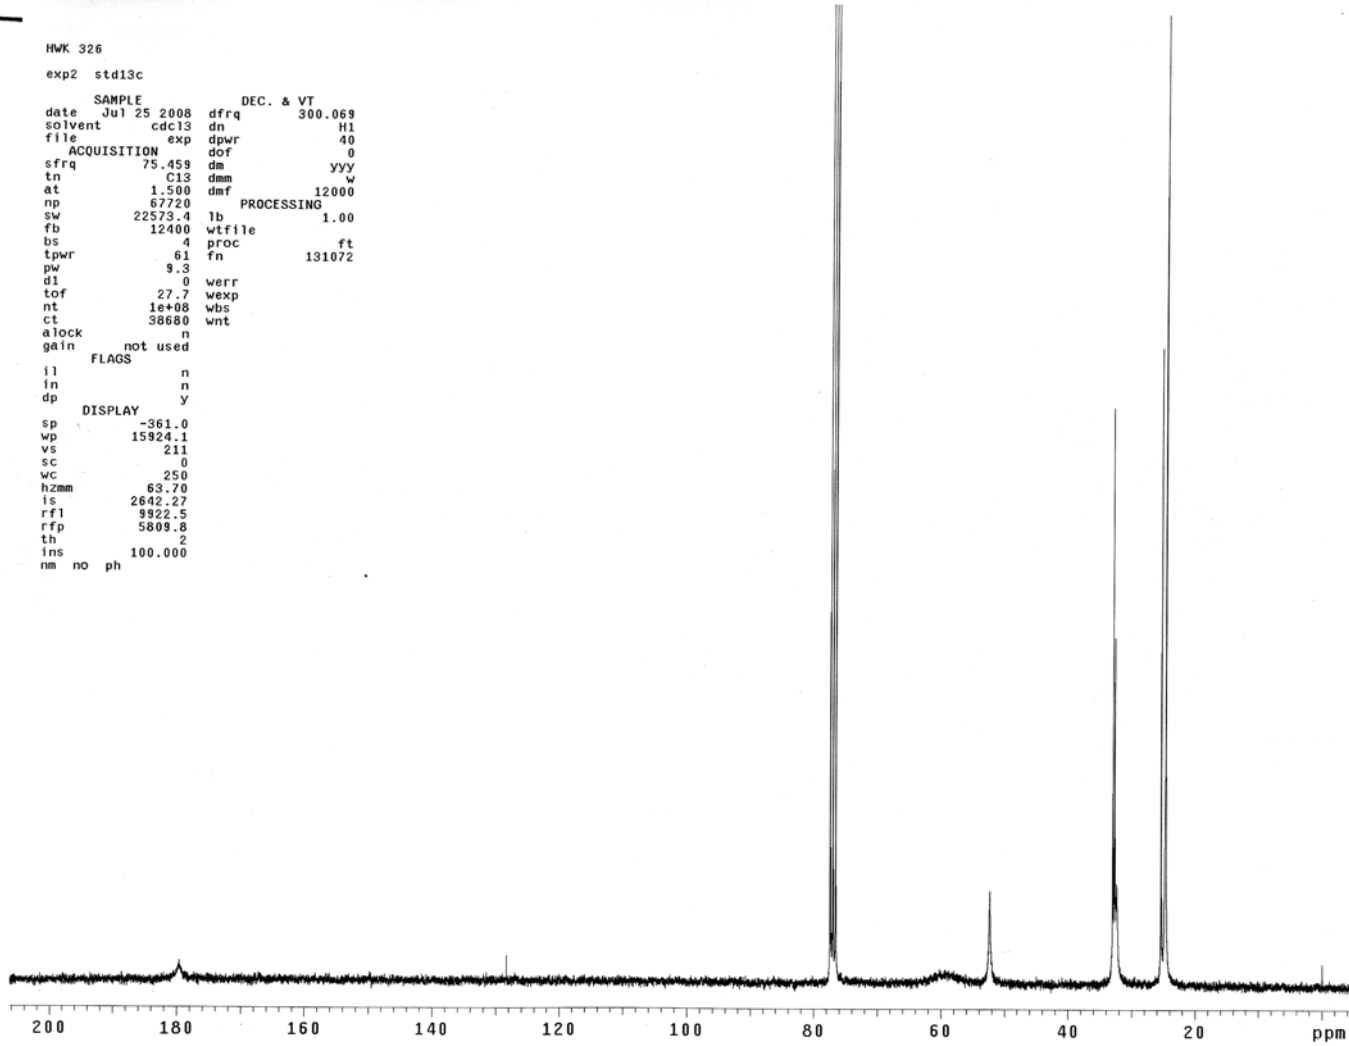

File Name : c:\samples\dsc12956.mss  
Creation Date/Time : 5-12-2007 at 11:44:56  
File Type : Lo-Res Mass Data (Centroid)  
File Source : Acquired on MASPEC system [msw/96A2]  
File Title : 4 (326)  
Operator : D.Siatkowska  
Instrument : AMD 402

SCAN GRAPH. Flagging=M/z.

Scan 16-2:26. Entries=298. 100% Int.=47081.

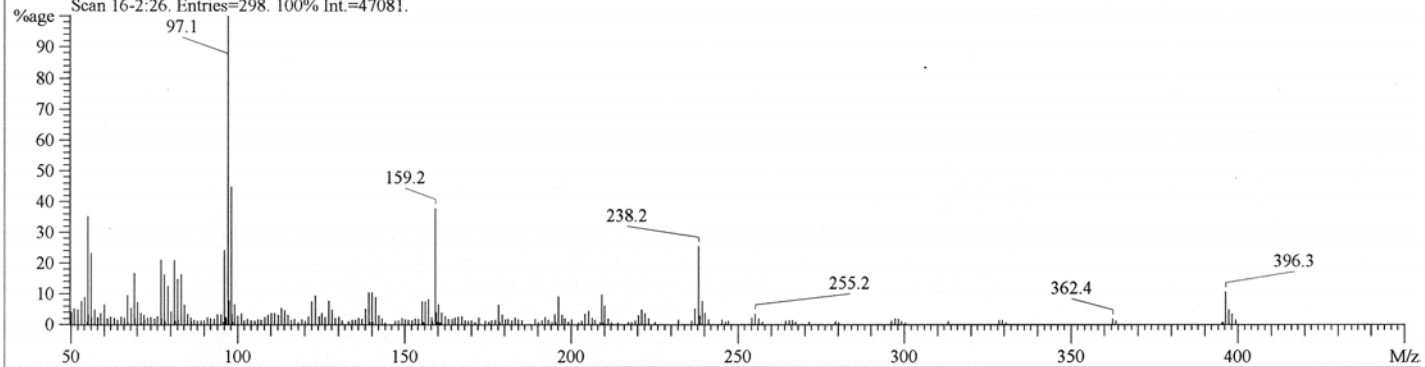

Compound 7

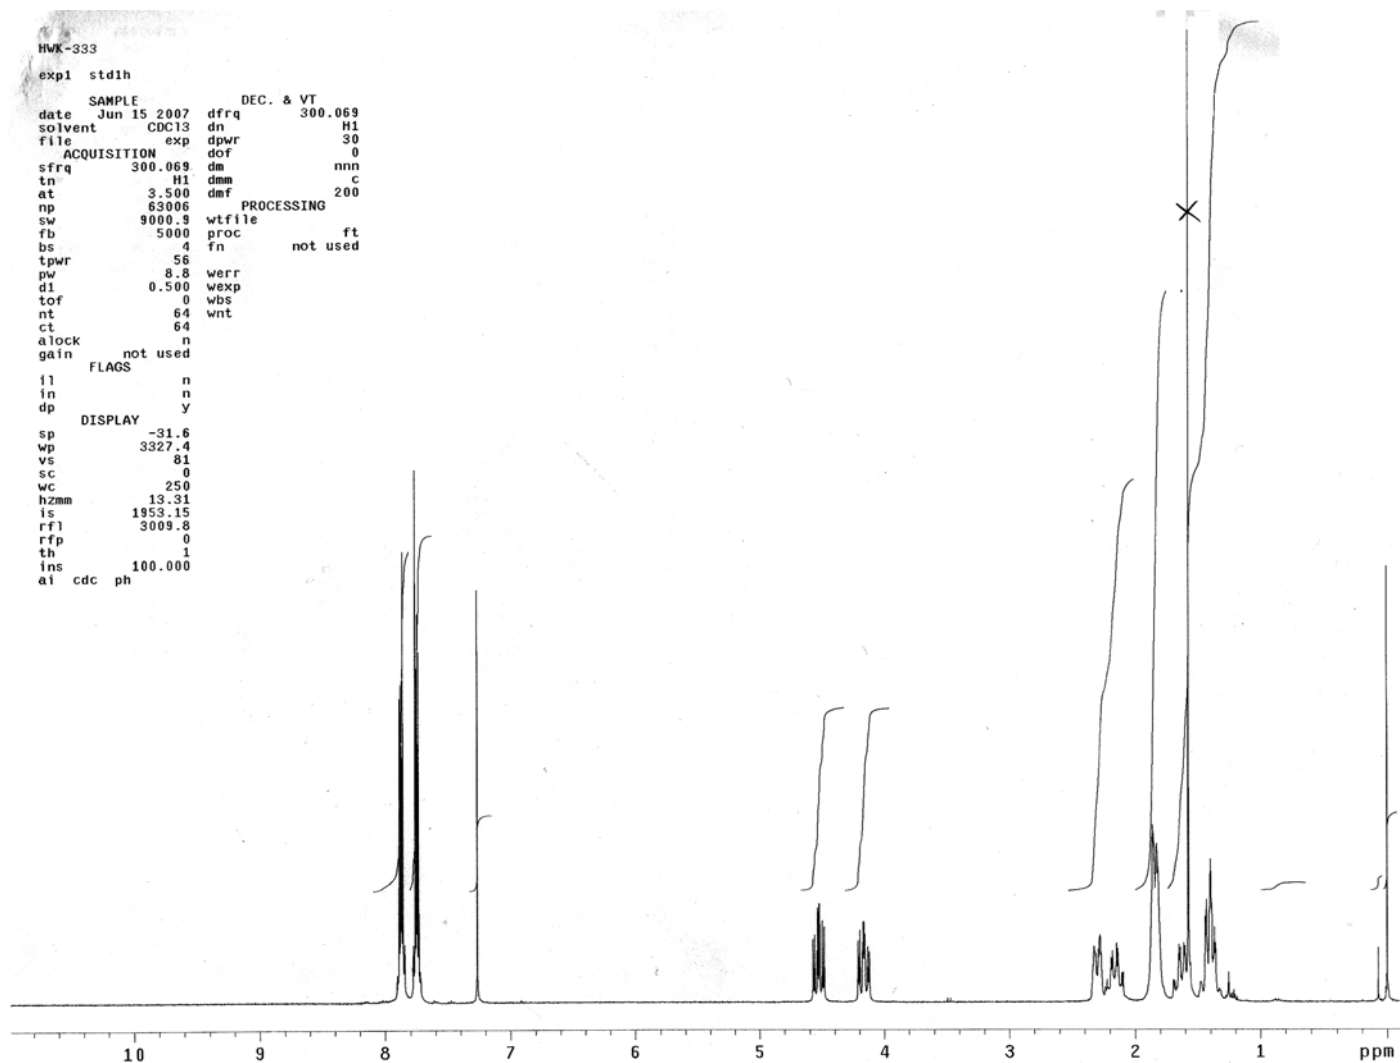



HWK 333

exp2 std13c

```
SAMPLE          DEC. & VT
date Jul 19 2008 dfrq          300.069
solvent cdc13      dn          H1
file      exp      dpwr         40
ACQUISITION    dof          0
sfrq      75.459  dm          yy
tn         C13      dmm         w
at         1.500  dmf         12000
np         67720          PROCESSING
sw         22573.4 lb          1.00
fb         12400  wtfile
bs         4        proc      ft
tpwr      61      fn          131072
pw         9.3
d1         0        werr
tof        27.7  wexp
nt         1e+08  wbs
ct         40404  wnt
alock      n
gain      not used
          FLAGS      n
          in         n
          dp         y
DISPLAY
sp         -131.2
wp         14965.2
vs         176
sc         0
wc         250
h2mm      59.86
ls         2642.27
rf1        9921.8
rfp        5809.8
th         4
ins        100.000
nm no ph
```

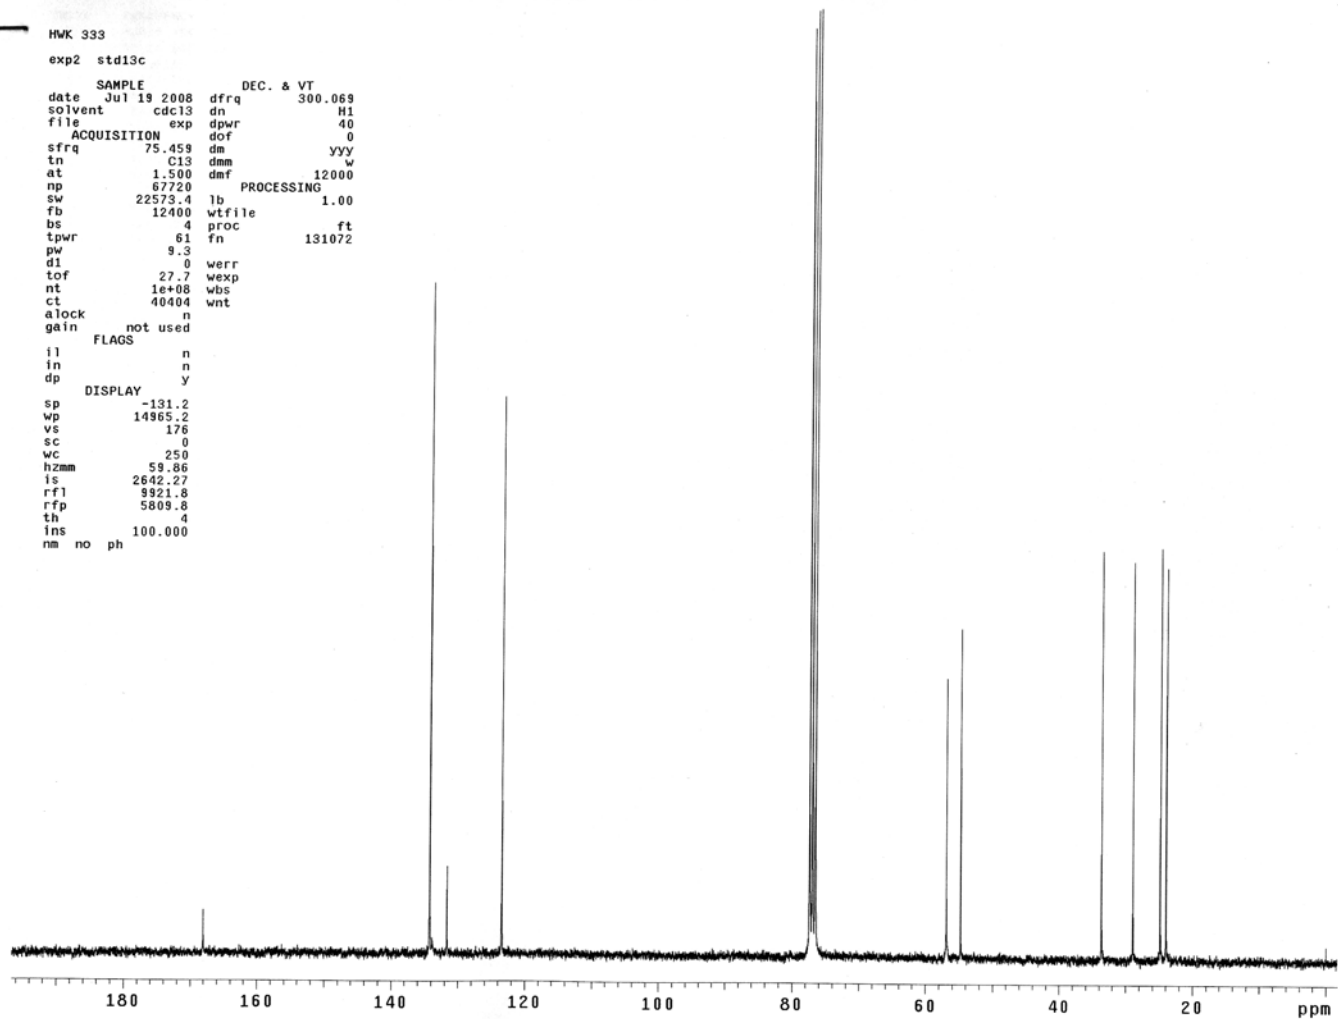

File Name : c:\samples\dse12957.mss  
Creation Date/Time : 5-12-2007 at 11:53:17  
File Type : Lo-Res Mass Data (Centroid)  
File Source : Acquired on MASPEC system [msw/96A2]  
File Title : 2 (333)  
Operator : D.Siatkowska  
Instrument : AMD 402

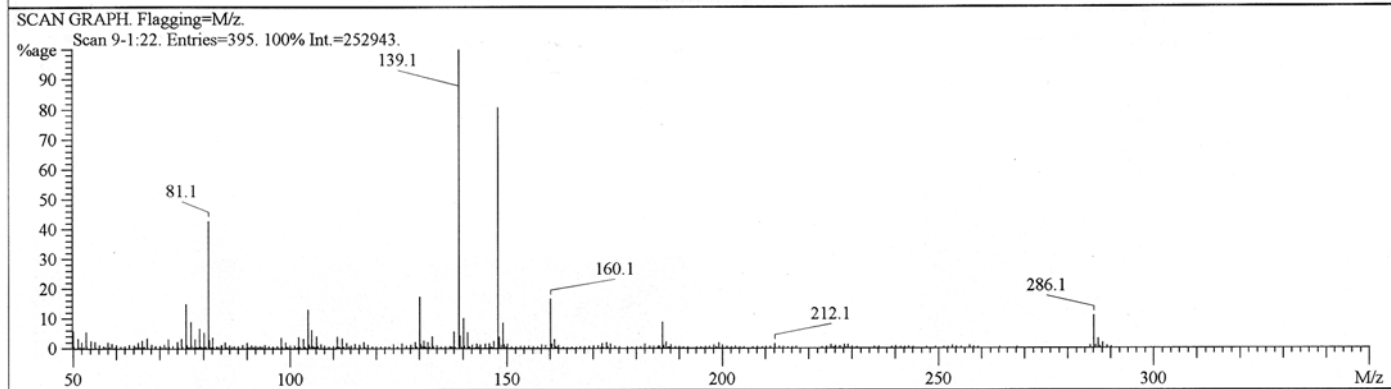

Compound 8a

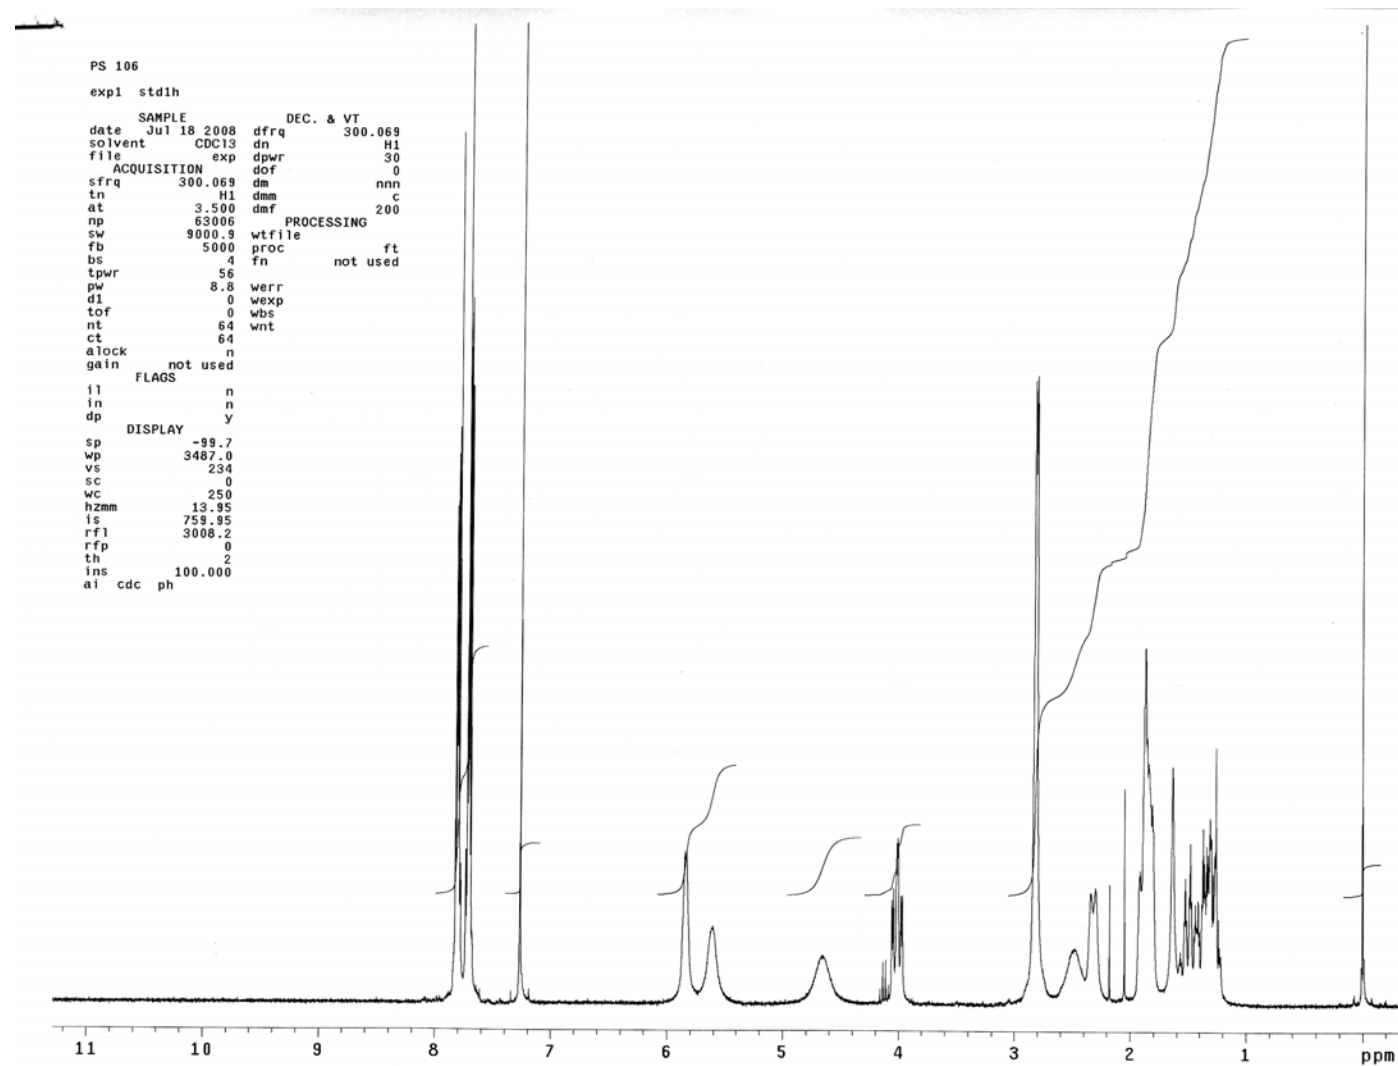

PS 106

exp2 std13c

```

SAMPLE
date Jul 26 2008 dfrq DEC. & VT 300.069
solvent cdc13 dn H1
file exp dpwr 40
ACQUISITION
sfrq 75.459 dm dof 0
tn C13 dmm w
at 1.500 dmf 12000
np 67720 PROCESSING
sw 22573.4 lb 1.00
fb 12400 wtfile
bs 4 proc ft
tpwr 61 fn 131072
pw 9.3
d1 0 werr
tof 27.7 wexp
nt 1e+08 wbs
ct 40432 wnt
a1ock n
gain not used
FLAGS
il n
in n
dp y
DISPLAY
sp 723.3
wp 14840.2
vs 385
sc 0
wc 250
hzmm 59.36
ls 2642.27
rf1 9921.8
rfp 5809.8
th 4
ins 100.000
nm no ph
```

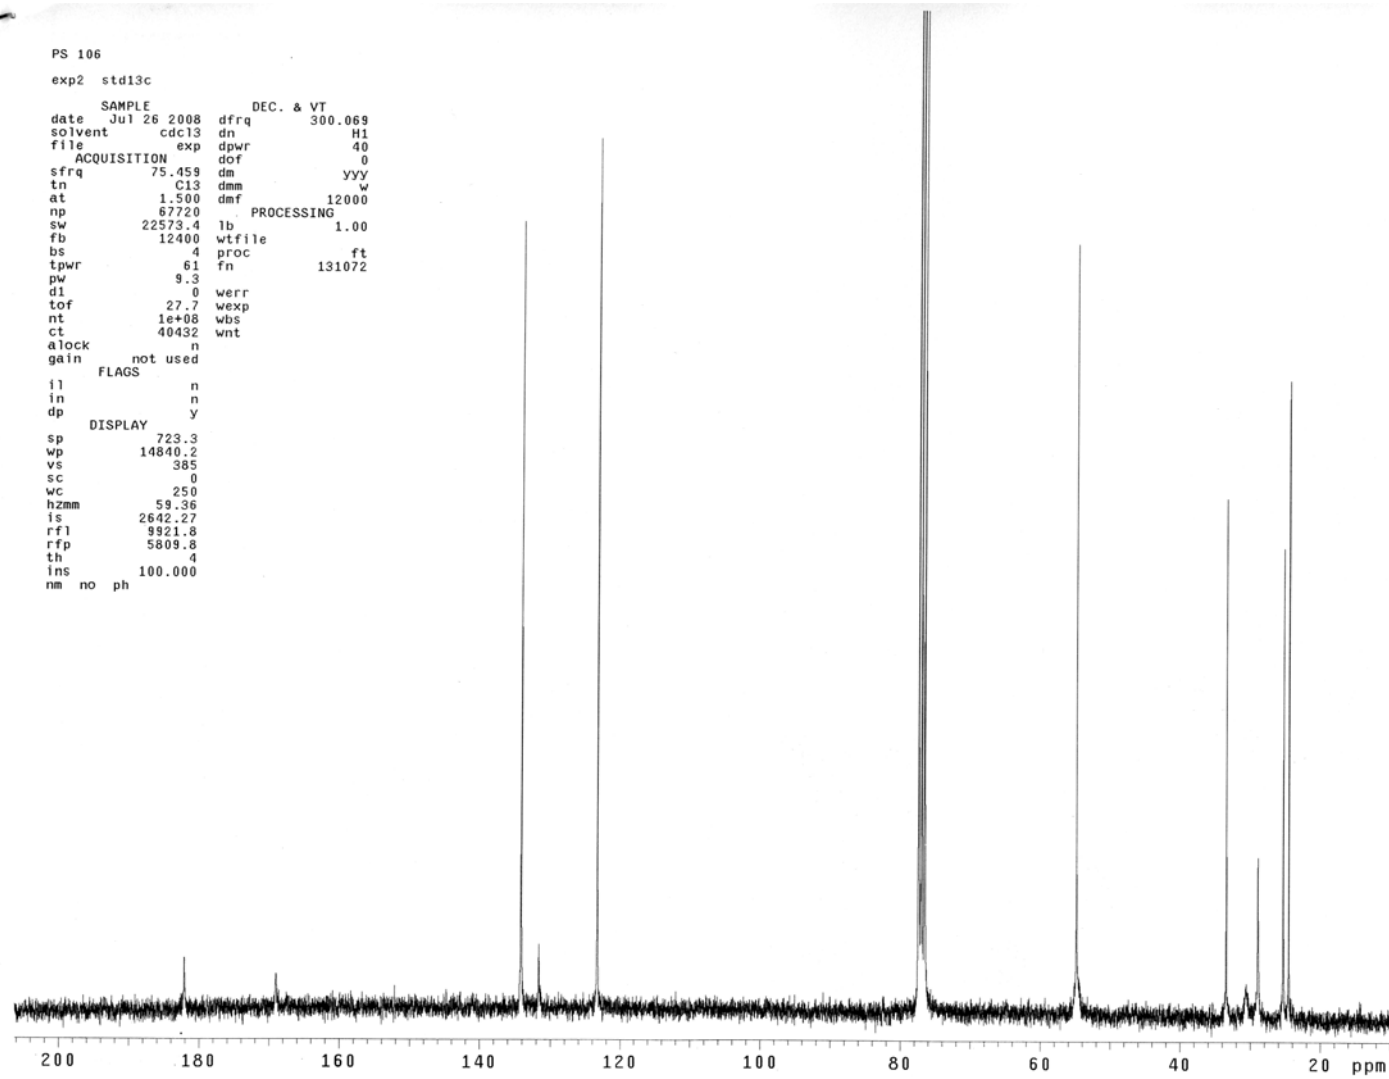

File Name : c:\samples\dsf06790.mss  
Creation Date/Time : 8.9.08 at 11:16:27  
File Type : Lo-Res Mass Data (Centroid)  
File Source : Acquired on MASPEC system [msw/96A2]  
File Title : PS-106 /NBA  
Operator : D.Siatkowska  
Instrument : AMD 604

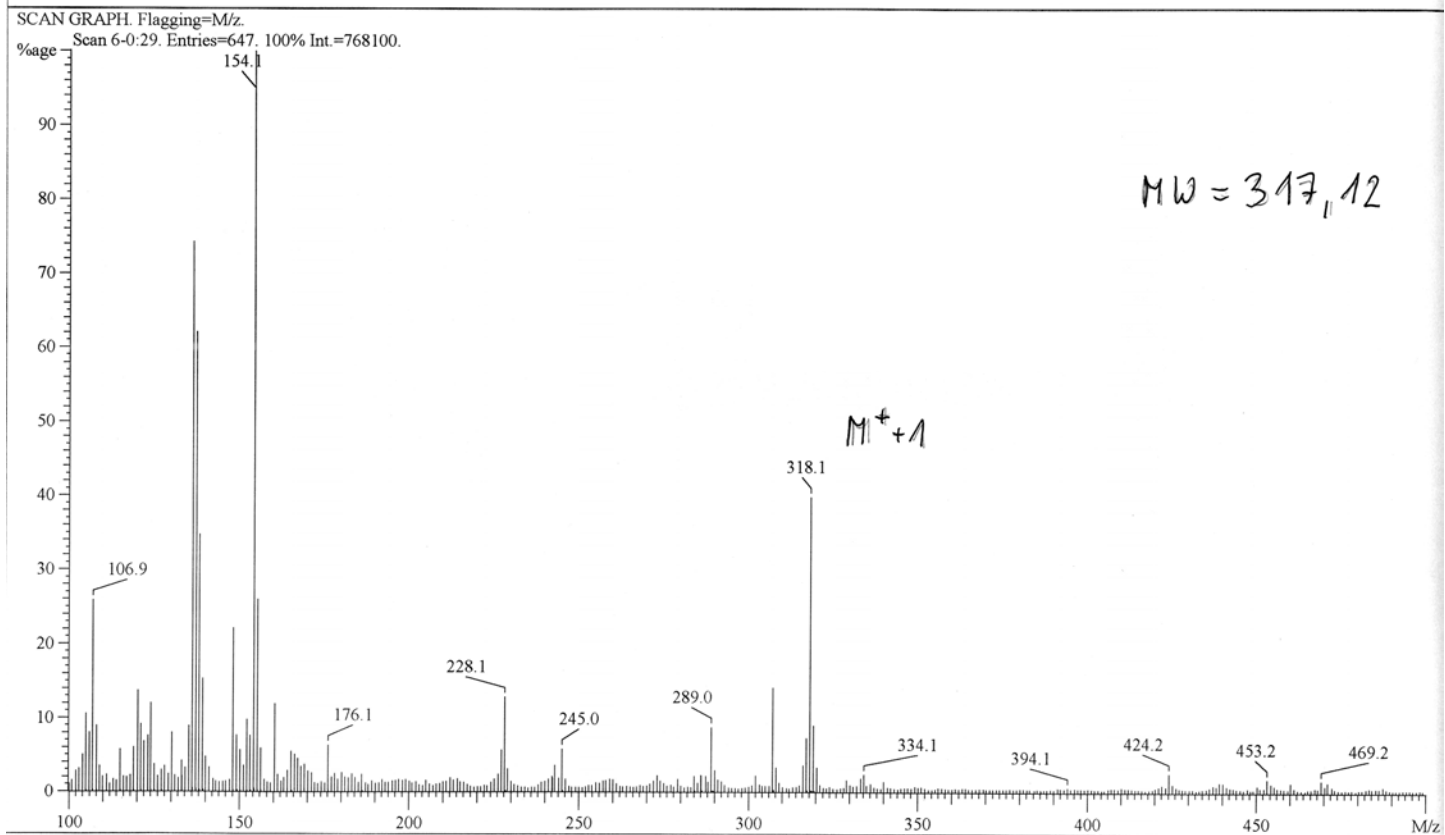

Compound **8b**

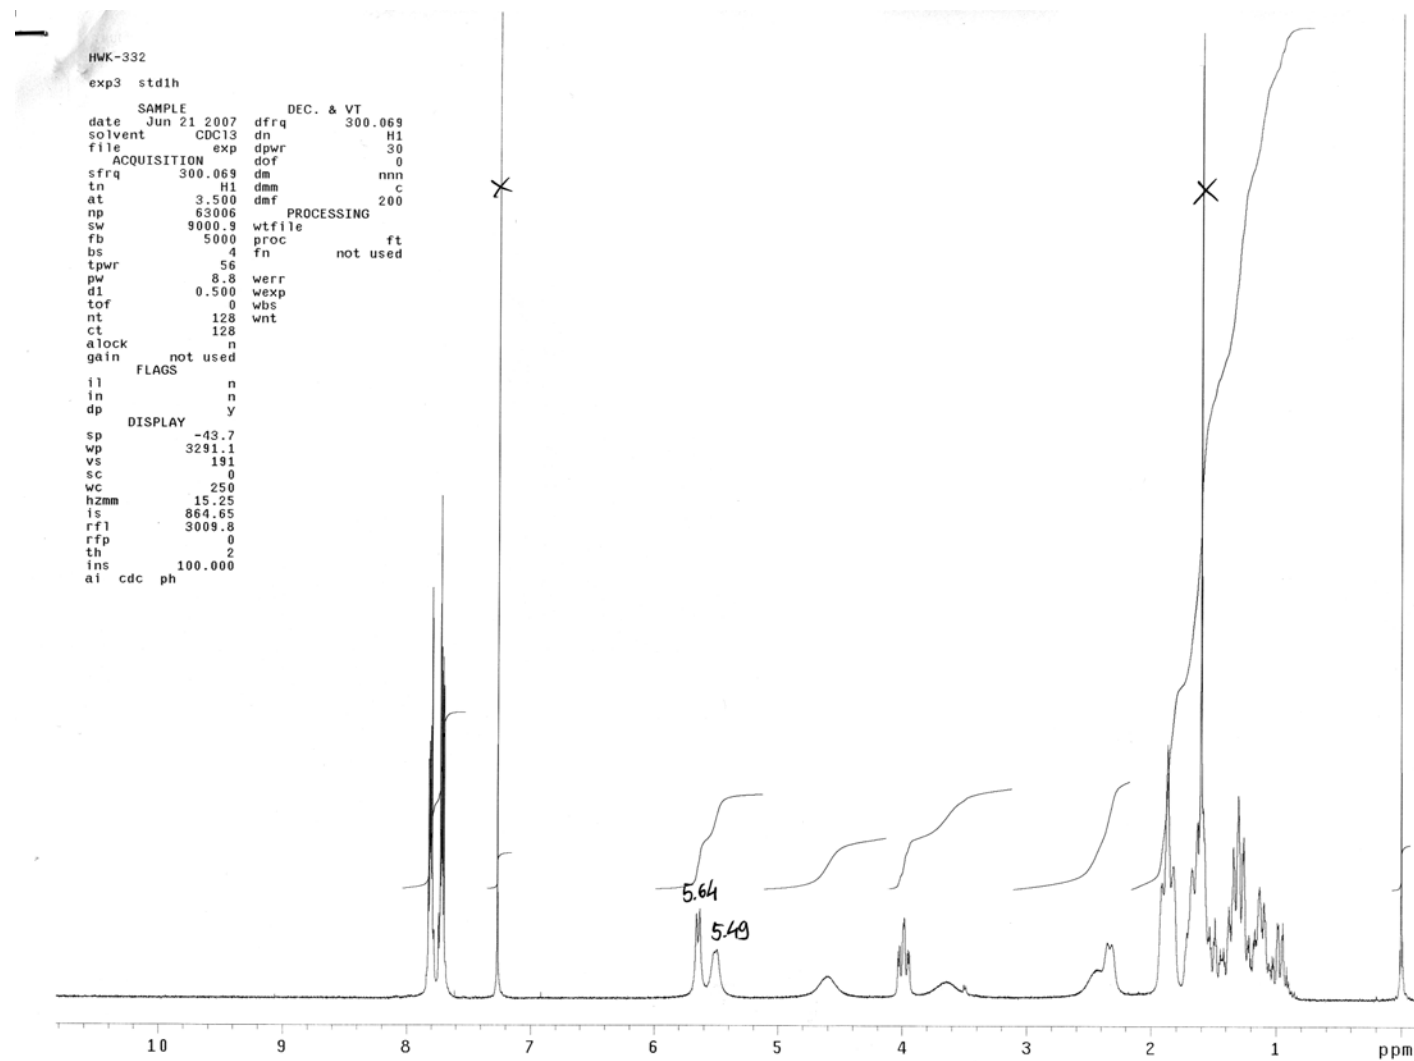

HWK 332

exp2 std13c

```
SAMPLE          DEC. & VT
date Jul 18 2008 dfrq 300.069
solvent cdcl3    dn      H1
file      exp   dpwr   40
          ACQUISITION dof    0
sfrq      75.459 dm     yy  w
tn         C13  dmm     w
at         1.500 dmf    12000
np         67720          PROCESSING
sw         22573.4 lb     1.00
fb         12400 wfile
bs         4      proc   ft
tpwr      61     fn     not used
pw         9.3
d1         0      werr
tof        27.7  wexp
nt         1e+06 wbs
ct         40592 wnt
alock      not used
gain       not used
          FLAGS
il         n
in         n
dp         y
          DISPLAY
sp         -318.6
wp         16862.1
vs         347
sc         0
wc         250
h2mm      67.45
is         2642.27
rfl        9921.8
rfp        5809.8
th         5
ins        100.000
nm no ph
```

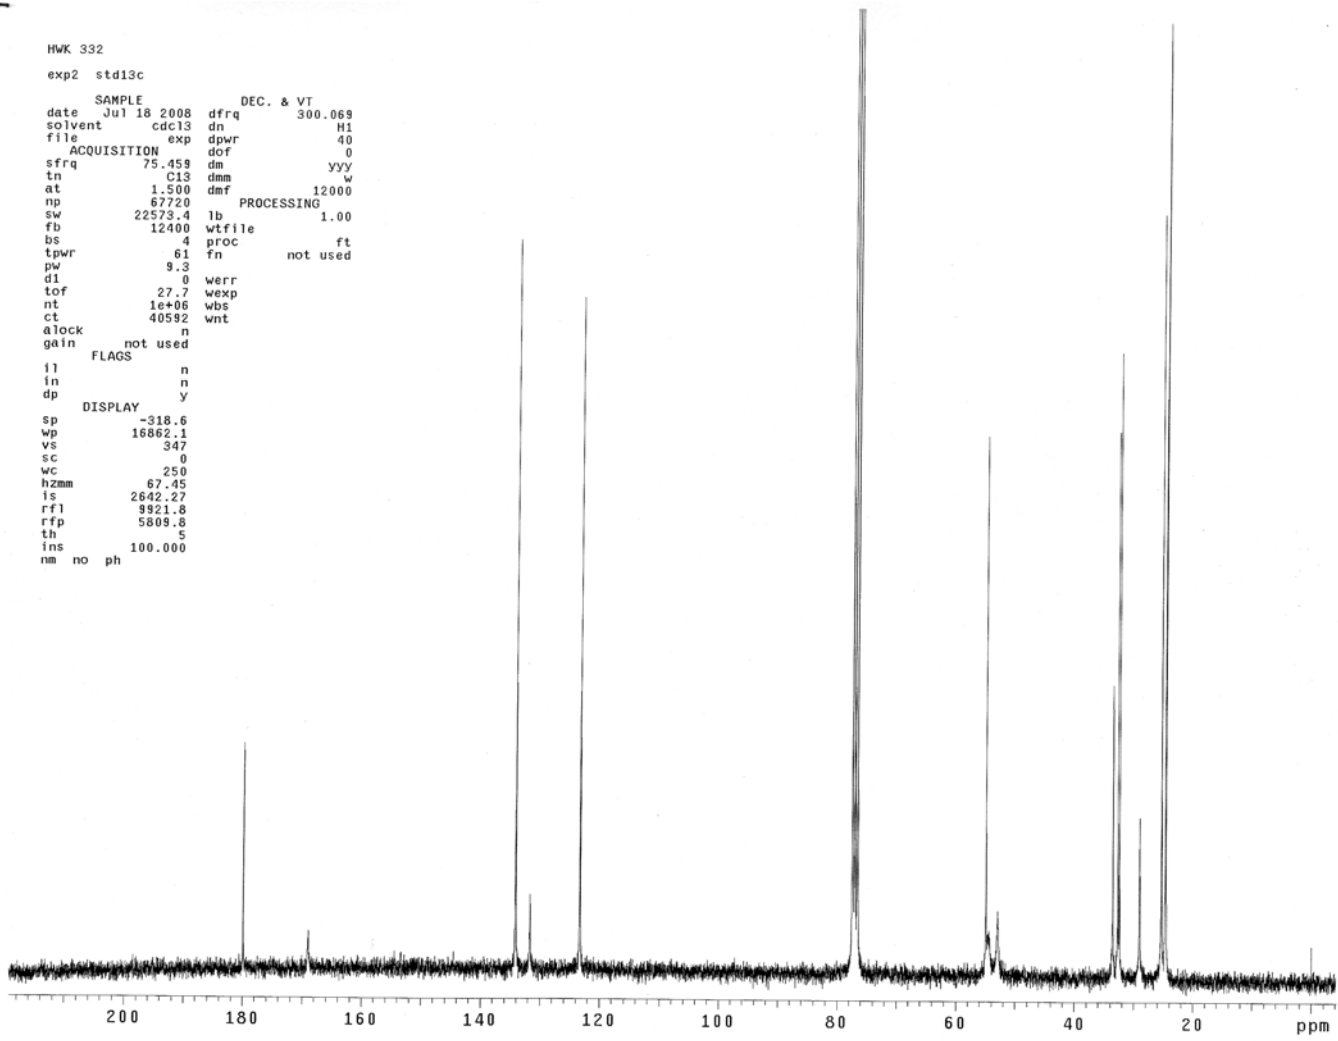

File Name : c:\samples\dse12958.mss  
Creation Date/Time : 5-12-2007 at 12:01:31  
File Type : Lo-Res Mass Data (Centroid)  
File Source : Acquired on MASPEC system [msw/96A2]  
File Title : 1 (532)  
Operator : D.Siatkowska  
Instrument : AMD 402

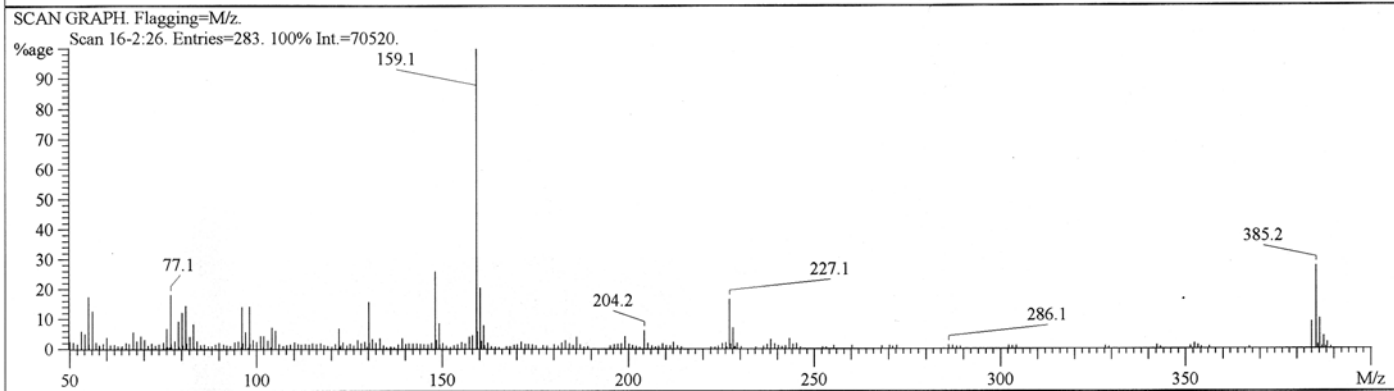



Compound 9

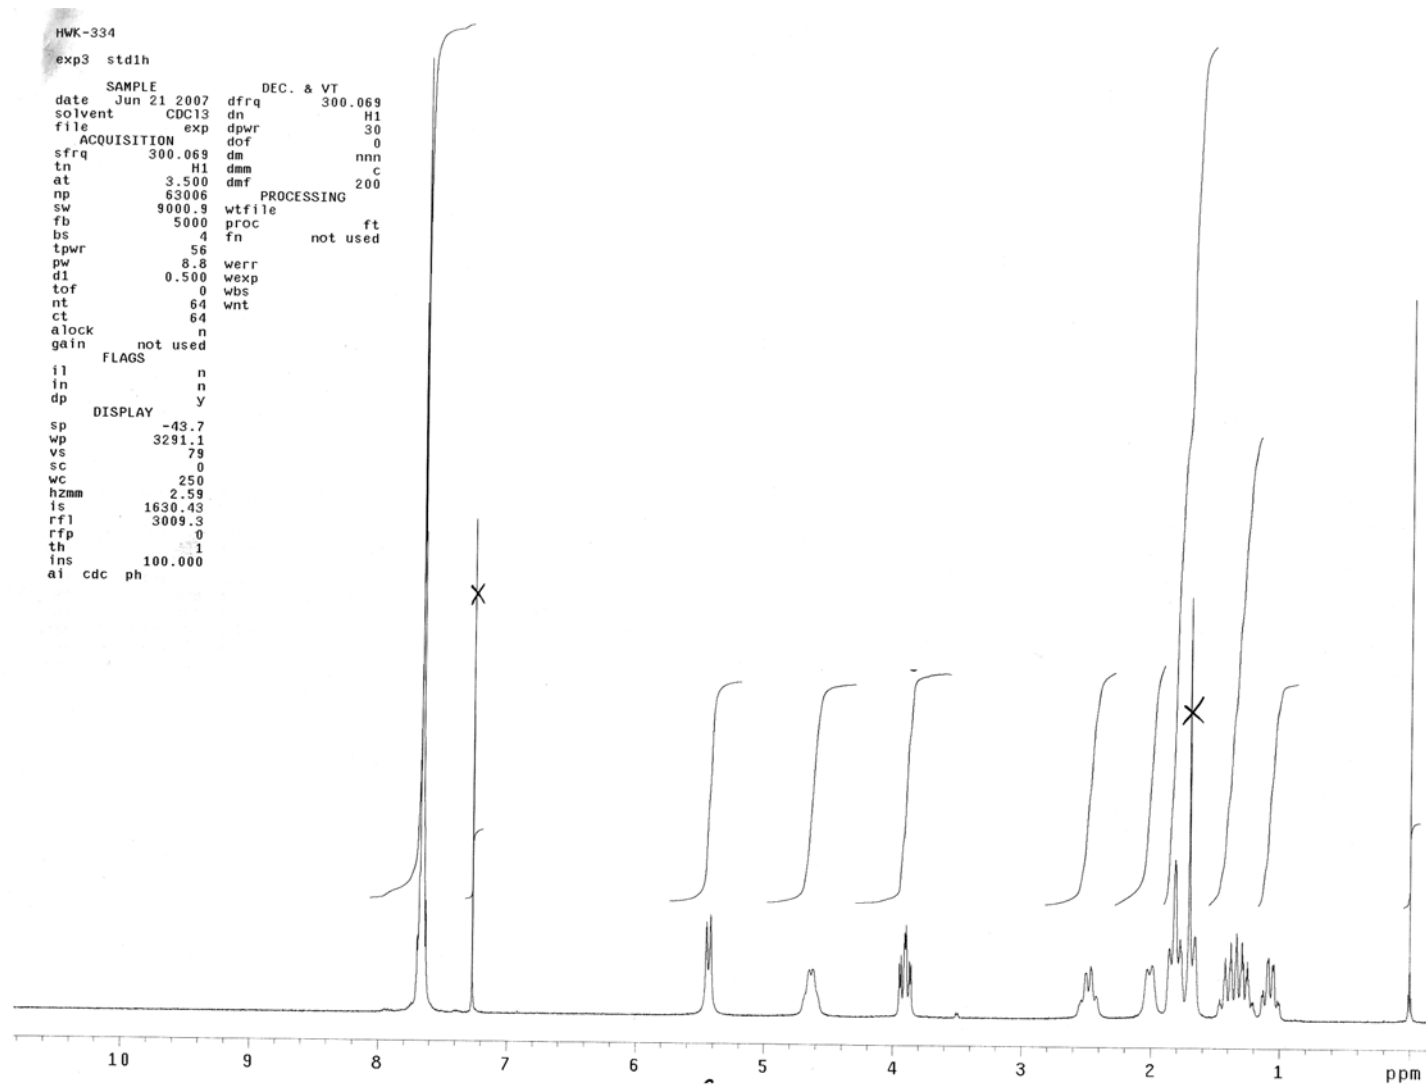

HWK 334

exp2 std13c

```

SAMPLE          DEC. & VT
date Jul 20 2008 dfrq 300.069
solvent cdc13    dn      H1
file     exp    dpwr    40
ACQUISITION    dof     0
sfrq 75.459    dm      yy
tn C13         dmm     w
at 1.500       dmf     12000
np 67720       PROCESSING
sw 22573.4     lb      1.00
fb 12400       wfile
bs 4           proc   ft
tpwr 61        fn      131072
pw 9.3
d1 0          werr
tof 27.7      wexp
nt 1e+08     wbs
ct 40928     wnt
alock n
gain not used
FLAGS
il n
in n
dp y
DISPLAY
sp -298.6
wp 15903.5
vs 199
sc 0
wc 250
hzmm 63.61
is 2642.27
rfl 9922.5
rfp 5809.8
th 2
ins 100.000
nm no ph

```

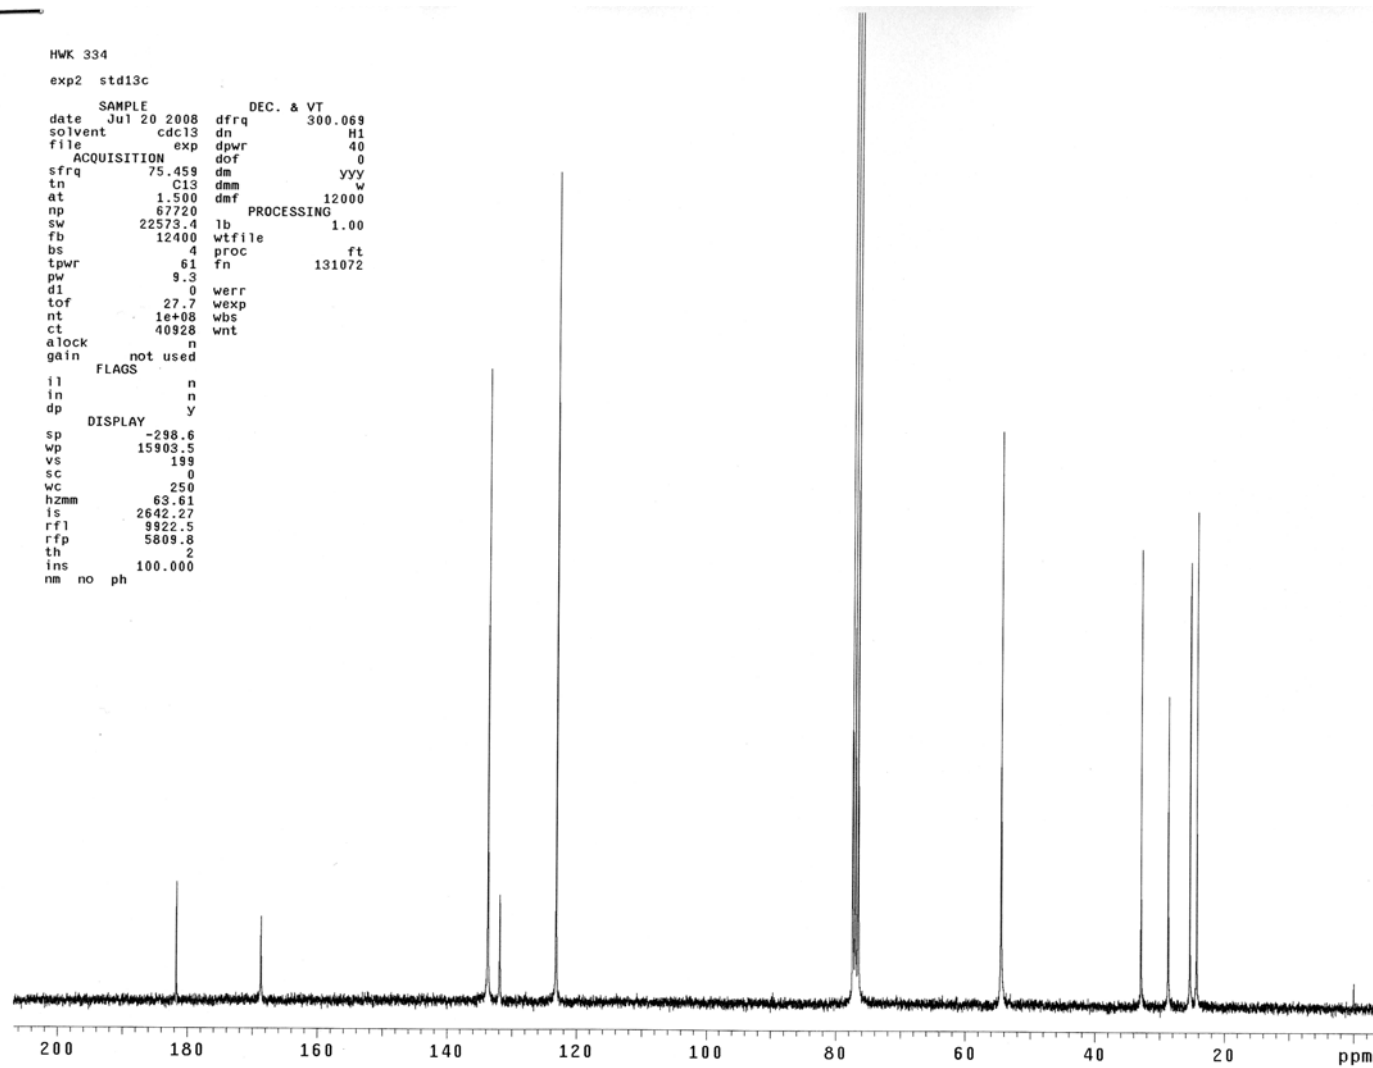

File Name : c:\samples\dse12959.mss  
Creation Date/Time : 5-12-2007 at 12:12:49  
File Type : Lo-Res Mass Data (Centroid)  
File Source : Acquired on MASPEC system [msw/96A2]  
File Title : 3  
Operator : D.Siatkowska  
Instrument : AMD 402

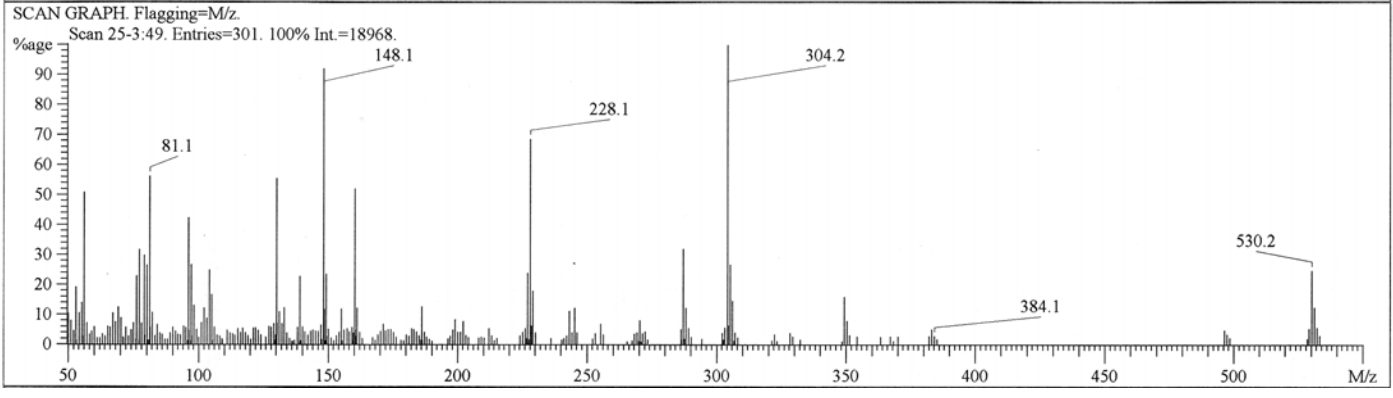

Compound 10

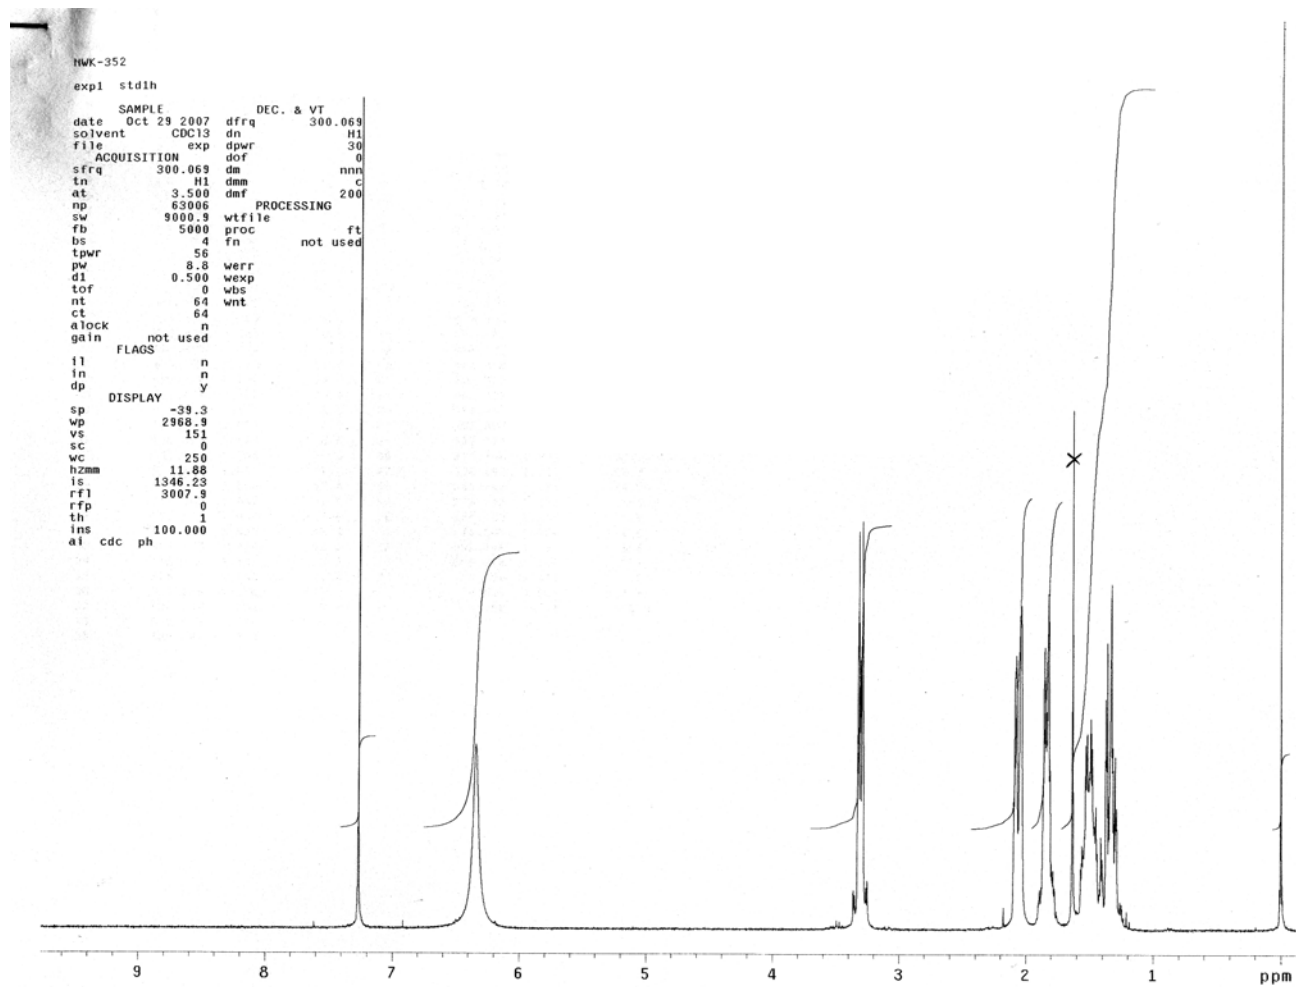

HWK 352

exp2 std13c

```
SAMPLE          DEC. & VT
date Jul 24 2008 dfrq 300.069
solvent cdc13   dn      H1
file    exp    dpwr   40
ACQUISITION    dof    0
sfrq 75.459   dm      yy
tn    C13     dmm     w
at    1.500   dmf     12000
np    67720
sw    22573.4 lb      1.00
fb    12400  wfile
bs    4      proc    ft
tpwr  61    fn      131072
pw    9.3
d1    0     werr
tof   27.7  wexp
nt    1e+08 wbs
ct    40708 wnt
alock n
gain  not used
FLAGS
il    n
in    n
dp    y
DISPLAY
sp    -444.0
wp    16028.5
vs    206
sc    0
wc    250
hzmm  64.11
fs    2642.27
rfl   9922.2
rff   5809.8
th    3
ins   100.000
nm no ph
```

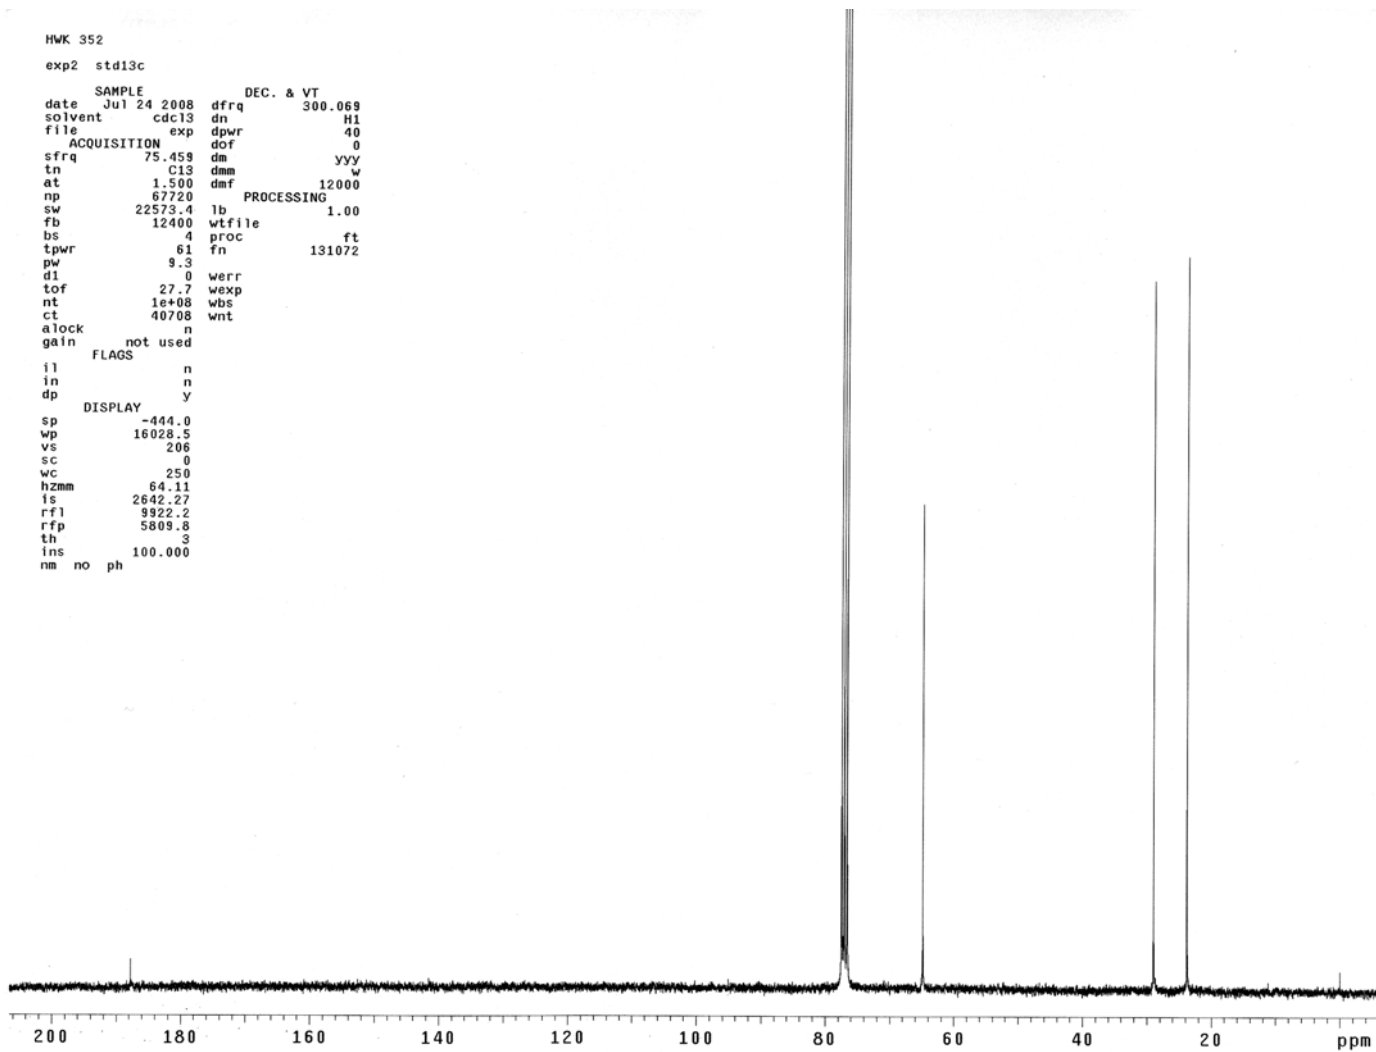

File Name : c:\samples\dse12842.mss  
Creation Date/Time : 5-11-2007 at 13:58:56  
File Type : Lo-Res Mass Data (Centroid)  
File Source : Acquired on MASPEC system [msw/96A2]  
File Title : HWK-352  
Operator : D.Siatkowska  
Instrument : AMD 402

SCAN GRAPH. Flagging=M/z.  
Scan 14-2.08. Entries=193. 100% Int.=101898.

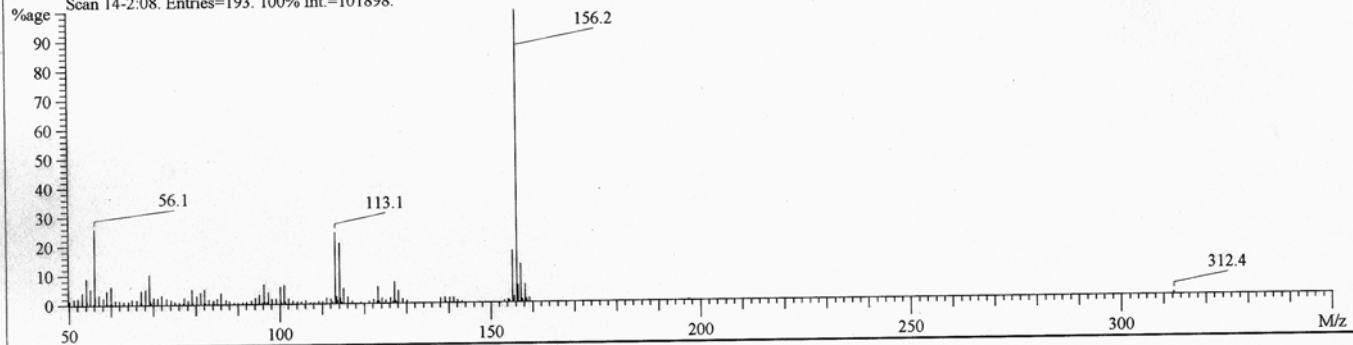

Supplement: b821335f.pdf [file b821335f.pdf]
